# Supplementary material for: Male meiotic spindle features that efficiently segregate paired and lagging chromosomes
Source: eLife. 2020 Mar 10;9:e50988. doi: 10.7554/eLife.50988 (PMC7101234; doi:10.7554/eLife.50988)
Supplement: Appendix 1—figure 2—source data 1. [file elife-50988-app1-fig2-data1.xlsx]

## Sheet: Appendix-Figure 2A
Time rel. to anaphase onset [min]	Autosome-to-autosome distance mean [µm]	Autosome-to-autosome distance SD [µm]	Pole-to-pole distance mean [µm]	Pole-to-pole distance SD [µm]
-5	0.783333	0.0983192	3.74231	0.290066
-4.5	0.7375	0.168502	3.81923	0.287081
-4	0.790909	0.20226	3.89615	0.266054
-3.5	0.76	0.159463	3.93846	0.320096
-3	0.757895	0.153897	4.02143	0.292318
-2.5	0.847619	0.147034	4.00345	0.31223
-2	0.869565	0.186924	4.06207	0.262425
-1.5	0.864	0.193391	4.03103	0.285486
-1	0.964286	0.219788	4.22333	0.287298
-0.5	1.12667	0.263836	4.34516	0.276693
0	2.0129	0.500494	4.89032	0.393577
0.5	3.19677	0.470803	5.63226	0.445262
1	4.06129	0.449946	6.32258	0.461671
1.5	4.67742	0.477989	6.85161	0.436555
2	5.26452	0.44613	7.32258	0.468835
2.5	5.56129	0.52133	7.53871	0.428701
3	5.81613	0.442038	7.76452	0.461554
3.5	6.02258	0.438718	7.79333	0.61808
4	6.13871	0.459476	7.77	0.582
4.5	6.27241	0.493455	7.94643	0.547372
5	6.42308	0.531645	8.00455	0.572777
5.5	6.42632	0.372443	7.98571	0.530395
6	6.71111	0.183333	8.07143	0.492322
6.5	6.6	0.3937	8	0.616441
						Autosome-to-autosome distance [µm]	Pole-to-pole distance [µm]
					Metaphase no. 1	0.75518	3.10285
					Metaphase no. 2	0.939411	3.40897
					Metaphase no. 3	0.991914	3.44976
					Anaphase onset	0.996925	3.51134
					Anaphase no. 1	2.98475	4.96888
					Anaphase no. 3	3.34501	5.22187
					Anaphase no. 4	3.36663	4.98648
					Anaphase no. 7	5.44475	7.04339

## Sheet: Appendix-Figure 2B
Time rel. to anaphase onset [min]	Autosome-to-autosome distance mean [µm]	Autosome-to-autosome distance SD [µm]	Pole-to-autosome distance mean [µm]	Pole-to-autosome distance SD [µm]
-5	0.783333	0.0983192	1.46667	0.242462
-4.5	0.7375	0.168502	1.525	0.184391
-4	0.790909	0.20226	1.56818	0.273228
-3.5	0.76	0.159463	1.55	0.263596
-3	0.757895	0.153897	1.64737	0.255467
-2.5	0.847619	0.147034	1.57619	0.272128
-2	0.869565	0.186924	1.59783	0.28401
-1.5	0.864	0.193391	1.584	0.266006
-1	0.964286	0.219788	1.62857	0.308494
-0.5	1.12667	0.263836	1.60833	0.285996
0	2.0129	0.500494	1.43871	0.359578
0.5	3.19677	0.470803	1.21774	0.257685
1	4.06129	0.449946	1.13065	0.260258
1.5	4.67742	0.477989	1.0871	0.27668
2	5.26452	0.44613	1.02903	0.238429
2.5	5.56129	0.52133	0.98871	0.262463
3	5.81613	0.442038	0.974194	0.272773
3.5	6.02258	0.438718	0.891667	0.281215
4	6.13871	0.459476	0.837288	0.275992
4.5	6.27241	0.493455	0.836538	0.270822
5	6.42308	0.531645	0.812195	0.274039
5.5	6.42632	0.372443	0.739286	0.257249
6	6.71111	0.183333	0.815385	0.315822
6.5	6.6	0.3937	0.871429	0.256348
						Autosome-to-autosome distance [µm]	Pole-to-autosome distance [µm]
					Metaphase no. 1	0.75518	1.48216
					Metaphase no. 2	0.939411	1.39715
					Metaphase no. 3	0.991914	1.42273
					Anaphase onset	0.996925	1.49656
					Anaphase no. 1	2.98475	1.23111
					Anaphase no. 3	3.34501	1.16575
					Anaphase no. 4	3.36663	1.05809
					Anaphase no. 7	5.44475	1.02718
