# Supplementary material for: Male meiotic spindle features that efficiently segregate paired and lagging chromosomes
Source: eLife. 2020 Mar 10;9:e50988. doi: 10.7554/eLife.50988 (PMC7101234; doi:10.7554/eLife.50988)
Supplement: Appendix 1—figure 3—source data 1. [file elife-50988-app1-fig3-data1.xlsx]

## Sheet: Appendix-Figure 3A
Time rel. to anaphase onset [min]	Centrosome volume mean [µm³]	Centrosome volume SD [µm³]
-5	2.94041	0.641613
-4.5	2.92167	0.640027
-4	2.89918	0.736809
-3.5	2.82048	0.748729
-3	2.84969	0.740836
-2.5	2.8934	0.706504
-2	2.93418	0.881959
-1.5	2.85892	0.796956
-1	2.89187	0.827608
-0.5	2.85008	0.978751
0	2.28007	1.03254
0.5	1.52937	0.835563
1	1.0962	0.643145
1.5	0.98881	0.643032
2	1.05932	0.563358
2.5	1.13227	0.625231
3	1.28458	0.664059
3.5	1.3901	0.69354
4	1.51727	0.693784
4.5	1.59207	0.674222
5	1.72126	0.732797
5.5	1.82123	0.632491
6	1.89968	0.692791
6.5	1.99046	0.704188
7	2.11134	0.700176
7.5	2.17128	0.723766

## Sheet: Appendix-Figure 3B
Time rel. to anaphase onset [min]	Centrosome volume mean [µm³]	Centrosome volume SD [µm³]
-5	1.25608	0.374972
-4.5	1.26811	0.351373
-4	1.2869	0.364105
-3.5	1.26188	0.363958
-3	1.2611	0.373844
-2.5	1.28214	0.381964
-2	1.30949	0.375755
-1.5	1.27997	0.412194
-1	1.3294	0.387158
-0.5	1.3404	0.407645
0	1.33338	0.438918
0.5	1.30603	0.439405
1	1.29521	0.497216
1.5	1.3056	0.517773
2	1.28188	0.474844
2.5	1.27523	0.444094
3	1.30381	0.519792
3.5	1.2954	0.444989
4	1.26928	0.557477
4.5	1.16982	0.486539
5	1.09586	0.536617
5.5	1.03536	0.487643
6	0.973864	0.532491
6.5	0.935061	0.477543
7	0.874485	0.560344
7.5	0.7444	0.477374
8	0.68397	0.48306
8.5	0.66809	0.451605
9	0.598458	0.425537
9.5	0.537051	0.44111
10	0.503911	0.456171
