# Supplementary material for: Male meiotic spindle features that efficiently segregate paired and lagging chromosomes
Source: eLife. 2020 Mar 10;9:e50988. doi: 10.7554/eLife.50988 (PMC7101234; doi:10.7554/eLife.50988)
Supplement: Appendix 1—figure 6—source data 1. [file elife-50988-app1-fig6-data1.xlsx]

## Sheet: Appendix-Figure 6B-end-on
Tortuosity of MTs at the X chromosome	Metaphase no. 1	Metaphase no. 2	Metaphase no. 3	Anaphase onset	Anaphase no. 1	Anaphase no. 3	Anaphase no. 4	Anaphase no. 7
End-on MTs	1.01472	1.00827	1.00998	1.01536	1.0635	1.39636	1.10576	1.06619
	1.04084	1.01214	1.01029	1.00538	1.02242	1.10065	1.00628	1.07013
	1.01433	1.00583	1.00906	1.01245	1.0223	1.09495	1.01447	1.04131
	1.00896	1.00712	1.01921	1.00855	1.02615	1.02524	1.00739	1.0059
	1.00563	1.00692	1.00815	1.00809	1.05247	1.05264	1.01449	1.03748
	1.29828	1.00347	1.00523	1.00361	1.12343	1.20717	1.00263	1.01129
	1.00912	1.00232	1.02012	1.00809	1.01495	1.02927	1.01174	1.00395
	1.00613	1.00504	1.00291	1.01365	1.01049	1.05547	1.00178	1.0146
	1.02028	1.00063	1.00371	1.00982	1.02496	1.05572	1.13295	1.01979
	1.01395	1.00201	1.00951	1.0058	1.04048	1.03903	1.0128	1.00315
	1.01122	1.00118	1.00632	1.00398	1.03193	1.17077	1.02135	1.00697
	1.01666	1.00274	1.00757	1.0052	1.01889	1.1133	1.002	1.00338
	1.0142	1.00236	1.01132	1.00335	1.04027	1.05587	1.00729	1.03411
	1.01596	1.00238	1.00818	1.01842	1.01786	1.11057	1.00743	1.01917
	1.00456	1.01391	1.02275	1.01699	1.0641	1.07872	1.02445	1.01025
	1.0039	1.00087	1.00765	1.00632	1.03327	1.33071	1.00298	1.02179
	1.01072	1.00272	1.0053	1.007	1.00871	1.02184	1.00626	1.01084
	1.01276	1.00124	1.05539	1.00364	1.04918	1.03799	1.00173	1.01873
	1.01396	1.00175	1.06851	1.00729	1.01684	1.01052	1.00223	1.01405
	1.01591	1.00126	1.03514	1.00312	1.04809	1.02093	1.14754	1.01034
	1.01295	1.0015	1.00577	1.00713	1.01079	1.00342	1.00363	1.07412
	1.00854	1.00183	1.01914	1.00672	1.01735	1.04433	1.01205	1.06471
	1.01704	1.0008	1.02928	1.00279	1.00039	1.05421	1.00434	1.01511
	1.00884	1.00156	1.01575	1.0058	1.00685	1.03126	1.03001	1.00844
	1.01381	1.00158	1.01961	1.00667	1.00899	1.00809	1.02731	1.09196
	1.00877	1.00235	1.00616	1.00068		1.05018	1.05073	1.01203
	1.01391	1.01122	1.00605	1.00343		1.13853	1.11757	1.00728
	1.00318	1.00475	1.00287	1.00228		1.01956	1.08949	1.03839
	1.01644	1.00243	1.00606	1.00224		1.05819	1.02852	1.16265
	1.04459	1.00541		1.00233		1.05171	1.02687	1.0775
	1.00344	1.00519		1.00946		1.01429	1.26867	1.04414
	1.0067	1.00135		1.00799		1.18979	1.2218	1.45281
	1.01327	1.00079		1.00663		1.02297	1.17099	1.22588
	1.02248	1.01023		1.00505		1.05262	1.03318	1.03538
	1.00561	1.00263		1.00661		1.00475	1.14858	1.00657
	1.00914	1.00082		1.01165		1.20375	1.14725	1.03038
	1.03971	1.00126		1.00678		1.10494	1.00084	1.00479
	1.01892	1.00331		1.00773		1.00636	1.04282	1.02218
		1.0025		1.0021		1.00075	1.00513	1.33321
		1.0028		1.01129		1.01727	1.07109	1.00661
		1.00995		1.01431		1.00758	1.16149	1.01276
		1.00103		1.01536		1.01418		1.26485
		1.00201		1.0088		1.01094
		1.01474		1.00642		1.01149
		1.00221		1.00739		1.02065
		1.00987		1.00518		1.09322
		1.00295		1.00803		1.05314
		1.00742		1.0085		1.15637
		1.00353		1.00878		1.08161
		1.00259		1.00743		1.06728
		1.00146		1.01411		1.70447
		1.00467		1.00435		1.00346
		1.00177		1.00914		1.02025
				1.01148
				1.00516
				1.00632
				1.00641
				1.00452
				1.00241
				1.00526
				1.00215
				1.00257
				1.00372
				1.02269
				1.01965
				1.01563
				1.00851
				1.00411
				1.00521
				1.00869
				1.00635
				1.00453
				1.02112
				1.00329

## Sheet: Appendix-Figure 6B-lateral
Tortuosity of MTs at the X chromosome	Metaphase no. 1	Metaphase no. 2	Metaphase no. 3	Anaphase onset	Anaphase no. 1	Anaphase no. 3	Anaphase no. 4	Anaphase no. 7
Lateral MTs	1.00756	1.01015	1.01309	1.0165	1.06787	1.11719	1.08245	1.07499
	1.00922	1.02735	1.01595	1.09912	1.21049	1.11775	1.00651	1.02281
	1.01712	1.00794	1.00981	1.02144	1.08704	1.2096	1.00622	1.02373
	1.02523	1.01486	1.00443	1.02021	1.0138	1.16478	1.00753	1.00767
	1.0108	1.01974	1.00737	1.0082	1.16983	1.0891	1.00782	1.20593
	1.02489	1.00796	1.01155	1.01325	1.1087	1.22616	1.08496	1.00212
	1.10977	1.00963	1.05632	1.00742	1.28858	1.0687	1.10088	1.01793
	1.03192	1.01408	1.00688	1.01917	1.09671	1.31674	1.02053	1.00915
	1.02237	1.00452	1.02165	1.00835	1.21097	1.12827	1.02249	1.00062
	1.01226	1.01329	1.0228	1.00849	1.01451	1.09552	1.10947	1.00549
	1.02193	1.00244	1.00849	1.02616	1.18381	1.14376	1.11384	1.01149
	1.01198	1.00803	1.01106	1.01333	1.01173	1.21033	1.29914	1.41131
	1.00751	1.00375	1.01622	1.00937	1.09024	1.24352	1.57869	1.03488
	1.00081	1.00884	1.01709	1.0035	1.03251	1.01884	1.05653	1.02315
	1.01078	1.00231	1.01151	1.00932	1.2317	1.0091	1.32428	1.02225
	1.01933	1.0016	1.00626	1.02385	1.2237	1.00487	1.02049	1.05197
	1.0139	1.00328	1.00577	1.01108	1.06804	1.04268	1.01545	1.01248
	1.0165	1.00324	1.00777	1.02896	1.05899	1.00406	1.02833	1.00918
	1.0137	1.01212	1.01896	1.00927	1.08436	1.08814	1.0324	1.05059
	1.00843	1.00144	1.00733	1.00421	1.09471	1.00712	1.47826	1.0095
	1.00623	1.00113	1.00453	1.01164	1.08265	1.04105	1.30752	1.0054
	1.02339	1.00976	1.01155	1.02121	1.04979	1.04942	1.0059	1.14156
	1.01233	1.0027	1.00528	1.01415	1.04012	1.09575	1.01141	1.13493
	1.00942	1.00288	1.00396	1.02123	1.07077	1.01131	1.00565	1.00274
	1.00495	1.00619	1.00515	1.00338	1.09855	1.00659	1.59734	1.13121
	1.00735	1.01207	1.00553	1.01694	1.1288	1.0121	1.08873	1.19991
	1.01026	1.00245	1.00808	1.00694	1.02667	1.0202	1.13875	1.04253
	1.00237	1.00432	1.00766	1.00892	1.07503	1.05781	1.13757	1.00106
	1.00464	1.00996	1.00738	1.00716	1.02796	1.01898	1.19261	1.01089
	1.00735	1.00712	1.00453	1.00666	1.08218	1.00374	1.55427	1.41167
	1.00578	1.00274	1.00665	1.00833	1.01641	1.04211		1.06838
	1.01553	1.01202	1.01128	1.01069	1.02388	1.0274		1.15817
	1.00266	1.00445	1.01134	1.00661	1.03667	1.03974		1.0044
	1.00704	1.00904	1.01785	1.00942	1.01912	1.8737		1.00538
	1.0058	1.00769	1.02266	1.00499	1.12142	1.0837		1.00833
	1.00589	1.00721	1.01955	1.0106	1.03432	1.03855
	1.01233	1.00597	1.03613	1.01612	1.09044	1.02547
	1.00509	1.01755	1.00606	1.01002	1.01323	1.05064
	1.01081	1.00183	1.00396	1.00867	1.25344	1.03023
	1.02068	1.00579	1.05118	1.00455	1.20651	1.00034
	1.02902	1.00548	1.08709	1.00726	1.10352	1.05472
	1.01189	1.01342	1.03155	1.00325	1.13326	1.51463
	1.01106	1.00197	1.04914	1.01185	1.01203	1.00531
	1.00987	1.00434	1.03424	1.01526	1.04075	1.04123
	1.03064	1.0051	1.02394	1.03263	1.10214	1.05544
	1.00679	1.02632	1.00603	1.01984	1.09487	1.00094
	1.0154	1.00246	1.02284	1.0416	1.03102	1.0375
	1.03131	1.00908	1.04866	1.00605	1.29068	1.00046
	1.00986	1.00215	1.01989	1.01084	1.01594	1.0223
	1.01916	1.00543	1.03984	1.02823	1.07285	1.0352
	1.0131	1.0021	1.0287	1.01096	1.01238	1.23455
	1.02309	1.01497	1.00271	1.01802	1.23237	1.00275
	1.00932	1.02714	1.00691	1.00435	1.02581
	1.01355	1.02619	1.01528	1.00438	1.01857
	1.00716	1.00347	1.0058	1.00929	1.01919
	1.03357	1.00369	1.00268	1.00219	1.1129
	1.01815	1.00355	1.02241	1.01395	1.04809
	1.03408	1.00167	1.03843	1.01949	1.01011
	1.0063	1.00069	1.0067	1.02719	1.00526
	1.04618	1.00306	1.03312	1.0102	1.14109
	1.02481	1.00326	1.01487	1.00706	1.24661
	1.04078	1.00147	1.04374	1.02049	1.00309
	1.0239	1.0052	1.00867	1.00834	1.06391
	1.00651	1.00117	1.01953	1.01031	1.10799
	1.03607	1.00063	1.00548	1.00481
	1.01182	1.00611	1.06683	1.02896
	1.00553	1.00071	1.03352	1.02061
	1.01099	1.00312	1.00613	1.00696
	1.01702	1.00967	1.01151	1.0135
	1.01742	1.01202	1.01142
	1.00995	1.0124	1.00826
	1.0111	1.01014	1.00462
	1.01833	1.00212	1.00867
	1.0194	1.00762	1.04501
	1.01194	1.0017	1.05111
	1.00236	1.00534	1.04996
	1.06934	1.0041	1.10964
	1.01456	1.00346	1.0275
	1.01689	1.0045	1.0026
	1.02019	1.00775
	1.01906	1.00293
	1.01019	1.0101
	1.01353	1.00818
	1.01594	1.01557
	1.01651	1.00231
	1.02471	1.00472
	1.00864	1.04065
	1.0322	1.00461
	1.01158	1.00602
	1.01226	1.00851
	1.00303	1.00804
		1.00716
		1.00126
		1.00565
		1.01792
		1.00169
		1.04507
		1.00206
		1.00227
		1.00358
		1.00349
		1.01725
		1.00213
