# Supplementary material for: Male meiotic spindle features that efficiently segregate paired and lagging chromosomes
Source: eLife. 2020 Mar 10;9:e50988. doi: 10.7554/eLife.50988 (PMC7101234; doi:10.7554/eLife.50988)
Supplement: Appendix 1—figure 7—source data 1. [file elife-50988-app1-fig7-data1.xlsx]

## Sheet: Appendix-Figure 7B
Time rel. to anaphase onset [min]	P-P distance mean wt [µm]	P-P distance SD wt [µm]	P-P distance mean tra-2 [µm]	P-P distance SD tra-2 [µm]
-5	3.74231	0.290066	3.88362	0.196166
-4.5	3.81923	0.287081	3.83176	0.315056
-4	3.89615	0.266054	3.99541	0.296351
-3.5	3.93846	0.320096	3.98784	0.272755
-3	4.02143	0.292318	4.1256	0.341007
-2.5	4.00345	0.31223	4.11665	0.272638
-2	4.06207	0.262425	4.12356	0.378099
-1.5	4.03103	0.285486	4.1739	0.354943
-1	4.22333	0.287298	4.23674	0.384859
-0.5	4.34516	0.276693	4.33227	0.324938
0	4.89032	0.393577	4.80474	0.495484
0.5	5.63226	0.445262	5.96054	0.645449
1	6.32258	0.461671	6.99933	0.683686
1.5	6.85161	0.436555	7.90947	0.643137
2	7.32258	0.468835	8.63619	0.706357
2.5	7.53871	0.428701	9.00589	0.68785
3	7.76452	0.461554	9.29236	0.75321
3.5	7.79333	0.61808	9.4693	0.819425
4	7.77	0.582	9.53485	0.955787
4.5	7.94643	0.547372	9.47268	1.00726
5	8.00455	0.572777
5.5	7.98571	0.530395
6	8.07143	0.492322
6.5	8	0.616441
