# Supplementary material for: Male meiotic spindle features that efficiently segregate paired and lagging chromosomes
Source: eLife. 2020 Mar 10;9:e50988. doi: 10.7554/eLife.50988 (PMC7101234; doi:10.7554/eLife.50988)
Supplement: Appendix 1—figure 9—source data 1. [file elife-50988-app1-fig9-data1.xlsx]

## Sheet: Appendix-Figure 9A
	Pole-to-autosome distance mean [µm]	Pole-to-autosome distance SD [µm]	MT length end-on mean [µm]	MT length end-on SD [µm]
Metaphase no. 1	1.48216	0.178326	0.785706	0.299457
Metaphase no. 2	1.39715	0.07062	0.618138	0.335014
Metaphase no. 3	1.42273	0.123745	0.677066	0.376003
Anaphase onset	1.49656	0.0974466	0.67445	0.400036
Anaphase no. 1	1.23111	0.19072	0.650376	0.38783
Anaphase no. 3	1.16575	0.0887732	0.653627	0.46557
Anaphase no. 4	1.05809	0.141338	0.585201	0.373436
Anaphase no. 7	1.02718	0.213584	0.632931	0.428073

## Sheet: Appendix-Figure 9B
	Pole-to-autosome distance mean [µm]	Pole-to-autosome distance SD [µm]	MT length lateral mean [µm]	MT length lateral SD [µm]
Metaphase no. 1	1.48216	0.178326	1.35263	0.608739
Metaphase no. 2	1.39715	0.07062	1.15231	0.591702
Metaphase no. 3	1.42273	0.123745	1.25053	0.678166
Anaphase onset	1.49656	0.0974466	1.35049	0.651728
Anaphase no. 1	1.23111	0.19072	1.36186	0.788318
Anaphase no. 3	1.16575	0.0887732	1.57854	0.911973
Anaphase no. 4	1.05809	0.141338	1.51584	0.74814
Anaphase no. 7	1.02718	0.213584	1.30818	0.939274
