# Supplementary material for: Male meiotic spindle features that efficiently segregate paired and lagging chromosomes
Source: eLife. 2020 Mar 10;9:e50988. doi: 10.7554/eLife.50988 (PMC7101234; doi:10.7554/eLife.50988)
Supplement: Figure 2—source data 1. [file elife-50988-fig2-data1.xlsx]

## Sheet: Figure 2B
Time rel. to onset of X chromosome segregation [min]	A1-A2 distance mean [µm]	A1-A2 distance SD [µm]	A1-X distance mean [µm]	A1-X distance SD [µm]	Shape coefficient mean	Shape coefficient SD
-2.5	4.37299	1.62761	2.16971	0.780173	1.2155	0.274605
-2	4.96338	1.2199	2.36918	0.626724	1.31371	0.194596
-1.5	5.41048	0.987184	2.50092	0.557834	1.40354	0.26409
-1	5.83582	0.733413	2.64532	0.495206	1.36023	0.306611
-0.5	6.04208	0.615169	2.69996	0.526489	1.35736	0.339
0	6.24269	0.457205	2.73749	0.576443	1.35393	0.347653
0.5	6.39203	0.461955	2.23045	0.28089	1.19604	0.279512
1	6.47351	0.476106	1.74158	0.504608	1.07208	0.238454
1.5	6.74022	0.653443	1.39459	0.474262	0.996229	0.257219
2	6.55722	0.455479	1.6398	0.112593	1.0344	0.224966
