# Supplementary material for: Male meiotic spindle features that efficiently segregate paired and lagging chromosomes
Source: eLife. 2020 Mar 10;9:e50988. doi: 10.7554/eLife.50988 (PMC7101234; doi:10.7554/eLife.50988)
Supplement: Figure 5—source data 1. [file elife-50988-fig5-data1.xlsx]

## Sheet: Figure 5A
End-on MTs on X chromosome	Metaphase no. 1	Metaphase no. 2	Metaphase no. 3	Anaphase onset	Anaphase no. 1	Anaphase no. 3	Anaphase no. 4	Anaphase no. 7
MT length in [nm]	1492.92	1679.32	940.127	1483.13	2102.71	2419.77	1086.83	3514.06
	1314.96	1139.57	914.851	887.359	1364.37	1737.66	1779.39	636.734
	1309.1	1135.61	1405.9	1253.21	1531.04	1991.7	1433.88	478.315
	1123.64	1231.85	1069.71	670.622	209.585	1214.69	686.487	712.703
	669.315	377.698	881.398	563.42	1997.89	1610.71	925.485	658.343
	1099.13	459.239	1315.25	936.205	2284.13	1727.23	1461.1	771.124
	1311.23	1484.91	1481.39	693.738	1981.49	1473.4	1886.43	718.989
	804.687	229.625	885.989	1178.42	1938.66	1433.97	1286.11	716.076
	821.631	823.069	779.955	910.987	1339.76	1358.27	700.642	174.62
	1067.15	250.894	603.265	961.052	1987.97	1300.35	1323.91	252.686
	1338.58	536.586	669.061	899.903	1459.84	243.465	1253.26	1648.46
	631.429	523.608	510.201	1081.41	1189.06	1430.63	1923.33	898.239
	1321.76	911.629	1007.15	565.953	1387.12	507.038	2292.27	643.717
	1126.34	845.123	720.938	695.075	1297.73	315.997	1195.96	717.731
	922.454	797.842	742.103	378.946	1769.82	707.298	1120.01	703.962
	1099.28	900.717	446.424	845.482	1860.52	642.027	957.436	884.599
	991.755	954.262	414.148	673.281	2053.27	270.226	1186.97	845.609
	747.316	802.276	1056.88	742.057	1728.82	2354.18	1428.41	875.755
	832.563	477.424	766.51	820.639	1857.24	2284.2	1725.35	941.118
	1114.53	819.191	409.581	544.178	1881.61	2541.99	1096.12	1207.93
	654.984	785.538	980.531	1229.09	1150.38	1805.44	1220.13	749.087
	897.028	897.683	1099.7	1150.3	1757.59	1791.54	1538.85	311.082
	850.561	954.847	797.179	940.158	1981.5	2544.82	2201.07	685.768
	1088.62	758.212	848.982	1295.77	1481.74	2156.52	1208.26	648.868
	1044.5	902.937	468.234	873.752	1980.72	1829.09	2087.55	412.187
	617.805	626.057	374.624	943.825	1158.09	2185.79	1465.59	2992.18
	1277.86	618.734	1064.3	527.051	1982.63	2533.61	2269.57	404.255
	1009.5	383.589	1165.55	1239.41		2023.67	2248.51	1968.6
	981.274	549.797	739.39	894.268		1826.24	1858.18	227.972
		513.051	499.14	1260.57		387.99	2192.64	937.181
		849.354	970.549	649.076		1475.6	1065.94	2268.06
		693.51	841.587	858.378		681.2	2515.64	2417.66
		1163.83	924.124	697.638		2846.8	2368.09	1557.82
		630.624	668.935	988.215		1943.86	1557.48	1313.04
		506.931	505.367	1277.37		1588.05	994.961	1379.87
		996.277	694.11	759.727		1234.1	2447.7	346.55
		555.559	973.13	775.959		1593.34		1757.7
			998.8	584.803		1316.13		1318.66
				500.55		1589.23		2564.05
				505.447		2018.26		776.733
				517.077		2999.5		486.983
				403.168		2332.98		620.66
				366.296		1582.44
				391.288		991.142
				320.404		2678.57
				447.592		2606.08
				815.781		204.498
				225.908		3200.2
				880.987		3099.28
				882.304		2530.52
				794.613
				638.123
				1139.61

## Sheet: Figure 5B
Lateral MTs on X chromosome	Metaphase no. 1	Metaphase no. 2	Metaphase no. 3	Anaphase onset	Anaphase no. 1	Anaphase no. 3	Anaphase no. 4	Anaphase no. 7
MT length in [nm]	1448.48	1820.33	1556.8	2143.99	1512.12	1629.81	3268.5	2414.27
	3258.11	1462.17	2181.97	2157.25	1205.66	2254.93	132.954	620.084
	1771.58	1204.62	972.269	1983.01	2805.02	1250.83	1733.12	573.68
	1652.82	1334.61	1805.5	1702.85	2781.76	1281.31	3247.98	557.268
	1653.69	1694.22	1455.07	1047.47	2781.27	2728.94	786.628	369.521
	1597.33	1797.34	1512.13	1711.76	2933.55	1777.37	2025.93	1011.46
	1671.48	1868.16	1487.44	1016.41	2249.11	1062.1	1296.03	416.992
	2303.17	1726.44	1147.79	1632.88	1335.34	2776.33	942.528	201.237
	1893.94	725.046	1632.66	1809.46	2127.64	690.376	1349.98	205.905
	1554.93	1625.95	1284.48	1569.05	696.332	460.949	2041.49	233.944
	701.619	1779.86	1975.32	1613.8	1853.39	2407.46	1522.45	751.385
	1700.1	1518.18	1455.07	1643.13	2508.9	874.642	441.495	1519.73
	901.482	2137.11	2254.47	1492.96	2387.5	2185.62	1244.13	1059.97
	1390.87	1152.5	2068.78	1323.88	2532.43	884.357	1505.55	947.124
	1011.68	871.008	1267.42	1773.48	743.568	2835.94	786.737	2770.19
	1613.77	369.989	1328.13	1139.94	2148.61	1766.3	511.551	1004
	1794.02	1646.61	1619.62	1688.53	2604.82	2573.29	2602.08	1378.21
	1196.96	1272.77	1109.27	1250.87	2322.54	1814.78	2792.28	946.22
	1450.05	457.826	1886.12	618.408	2145.98	2839.81	963.109	1142.81
	1341.04	1636.01	1978.15	1575.93	2044.77	1900.59	1565.04	690.863
	1205.92	301.684	294.994	697.037	438.404	2614	1930.25	550.653
	1046	1319.51	1313.98	1195.45	1698.42	2844.04	1990.53	2256.08
	602.704	868.888	512.563		1967.66	1854.11	1282.33	844.094
	1829.52	733.091	1612.87		1878.7	1658.11	2428.23	111.415
	1614.74	726.474	1759.2		2897.99	1855.47	2663.18	1943.98
	1445.92	1010.3	1514.36		1902.32	191.735	2403.53	1251.03
	1169.4	1393.92	1452.68		2048.26	1938.92	1019.58	1630.65
	516.201	1430.22	406.169		2754.59	702.289	3052.58	142.992
	849.276	593.548	1311.08		2607.85	1770.45	1439.3	1248.02
	1688.35	1027.19	1172.8		298.193	2167.88	2566.88	1100.07
	1067.99	936.073	1316.59		1742.47	2480.54	2429.33	1866.14
	1769.93	1279.31	1179.59		2119.69	1425.11	2930.58	1334.94
	1054.26	258.097	1290.05		2783.71	1516.12	2412.28	375.29
	957.075	1022.36	878.065		3763.12	2908.84	3196.11	344.572
	1535.35	1828.15	498.881		337.138	490.807	3499.06	318.492
	2413.3		527.384		2623.8	1440.82
	716.648		1381.88		2870.55	1083.06
	1281.39		810.422		3514.06	2470.35
	1657.15		507.426		2846.06	3435.3
	1265.21		429.26		2194.71	3010.99
	911.013		243.217		3028.29	1389.33
	1394.08		1543.93		1872.76	2514.2
	1914.64		947.346		2492.96	421.21
	1358.29		1079.74		1508.51	1756.35
	1693.49		2075.19		1567.61	2578.6
	1052.04		1563.91		1918.35	2400.56
	1694.14		1376.38		2439.54	816.586
	1304.32		1319.06		2224.12	253.11
	1352.53		1217.44		2015.22	832.833
	1636.93		1184.78		2221.87	1774.14
	1509.05		1905.01		3589.83	2951.05
	1423.92		1263.04		1024.93	2638.67
	1411.48		1107.92		2808.5	1568.86
	1740.42		939.298		2041.23	2662.09
	975.478		493.532		1738.82	394.466
	625.841		1205.25		1759.72
	1373.29		2215.49		2478.15
	1193.94		1221.43		2781.86
	837.41		1151.54		2024.5
	1057.58		919.476		2625.4
	811.813		836.067		1846.12
	1696.35		1264.36		3340.96
	578.197		1548.53
	2117.16		1196.24
	1648.09		1315.43
	1987.92		1306.34
	1320.68		1193.69
	3322.53		825.825
	1031.25		1021.04
	1455.28		698.584
	1550.28		1319.11
	1895.19		1666.09
	1808.96		1505.47
	1931.85		1157.54
	2457.61		1135.69
	1689.37		1748.58
	700.246		1463.79
	798.349		757.891
	1072.52		1651.12
			1115.03
			1320.92
			1563.35
			1488.55
			1491.92
			1697.16
			1175.29
			1021.88
			1396.36
			2019.08
			2026.09
			684.593

## Sheet: Figure 5C&D
Pole 1 End-on	Distance Pole 1-X	MT length mean [µm]	MT length SD [µm]		Pole 2 End-on	Distance Pole 2-X	MT length mean [µm]	MT length SD [µm]
Metaphase no. 1	1.63825	0.96826	0.20959		Metaphase no. 1	1.47974	1.09179	0.250822
Metaphase no. 2	1.76122	0.881728	0.335681		Metaphase no. 2	1.66395	0.737132	0.252508
Metaphase no. 3	1.80029	0.836062	0.294167		Metaphase no. 3	1.65701	0.828941	0.247334
Anaphase onset	1.61615	0.83023	0.303578		Anaphase onset	1.90027	0.958583	0.288915
Anaphase no. 1	2.59975	1.94555	0.176981		Anaphase no. 1	2.3898	1.60173	0.251776
Anaphase no. 3	2.29383	1.83689	0.447464		Anaphase no. 3	3.0407	2.36398	0.437163
Anaphase no. 4	2.21384	1.32278	0.376174		Anaphase no. 4	2.7733	2.17976	0.222879
Anaphase no. 7	2.68898	2.56405	0		Anaphase no. 7	4.37967	3.25312	0.26094
Pole 1 Lateral	Distance Pole 1-X	MT length mean [µm]	MT length SD [µm]		Pole 2 Lateral	Distance Pole 2-X	MT length mean [µm]	MT length SD [µm]
Metaphase no. 1	1.63825	1.43729	0.414304		Metaphase no. 1	1.47974	1.46592	0.60268
Metaphase no. 2	1.76122	1.38347	0.362909		Metaphase no. 2	1.66395	1.12794	0.395302
Metaphase no. 3	1.80029	1.28642	0.462895		Metaphase no. 3	1.65701	1.30129	0.430456
Anaphase onset	1.61615	1.33116	0.312767		Anaphase onset	1.90027	1.53378	0.376579
Anaphase no. 1	2.59975	2.40111	0.602065		Anaphase no. 1	2.3898	2.35174	0.467759
Anaphase no. 3	2.29383	2.1845	0.549269		Anaphase no. 3	3.0407	2.37001	0.486624
Anaphase no. 4	2.21384	2.10123	0.907567		Anaphase no. 4	2.7733	2.373	0.489463
Anaphase no. 7	2.68898	2.77019	0		Anaphase no. 7
