# Supplementary material for: Male meiotic spindle features that efficiently segregate paired and lagging chromosomes
Source: eLife. 2020 Mar 10;9:e50988. doi: 10.7554/eLife.50988 (PMC7101234; doi:10.7554/eLife.50988)
Supplement: Figure 6—source data 1. [file elife-50988-fig6-data1.xlsx]

## Sheet: Figure 6B
	Autosome-autosome distance [nm]	Ratio of MT polymer per 1 μm³ (Volume no. 1/Volume no. 2)
Metaphase no. 1	760.448	1.00029
Metaphase no. 2	939.731	1.11255
Metaphase no. 3	994.284	0.986228
Anaphase onset	998.919	0.995409
Anaphase no. 1	2986.43	1.06745
(Anaphase no. 2)	3144	1.32834
Anaphase no. 3	3347.43	1.19326
Anaphase no. 4	3368.55	1.78542
(Anaphase no. 5)	3577.2	1.01335
(Anaphase no. 6)	4473.41	1.78339
Anaphase no. 7	5446.64	2.33372

## Sheet: Figure 6F
Time rel. to onset of X chromosome segregation [min]	A1-A2 distance mean [µm]	A1-A2 distance SD [µm]	A1-X distance mean [µm]	A1-X distance SD [µm]	Ratio of fluorescence (V1/V2) mean	Ratio of fluorescence (V1/V2) SD
-2.5	3.94815	1.89786	1.84803	0.896784	1.06648	0.0961719
-2	4.62435	1.41715	2.17799	0.689234	1.02842	0.0485152
-1.5	5.18002	1.13196	2.34686	0.472608	1.05189	0.0257525
-1	5.72667	0.846076	2.54531	0.340218	1.06752	0.0374165
-0.5	6.0537	0.656468	2.60636	0.276763	1.10157	0.0454749
0	6.18364	0.482415	2.55648	0.224173	1.10078	0.0291018
0.5	6.4708	0.486274	2.10994	0.236248	1.16219	0.0512745
1	6.58399	0.433785	1.66728	0.171939	1.32838	0.145641
1.5	6.88498	0.664025	1.09194	0.140926	1.57397	0.194491
