# Supplementary material for: Male meiotic spindle features that efficiently segregate paired and lagging chromosomes
Source: eLife. 2020 Mar 10;9:e50988. doi: 10.7554/eLife.50988 (PMC7101234; doi:10.7554/eLife.50988)
Supplement: Figure 7—source data 1. [file elife-50988-fig7-data1.xlsx]

## Sheet: Figure 7E
Time rel. to anaphase onset [min]	A-A distance mean [µm]	A-A distance SD [µm]	P-P distance mean [µm]	P-P distance SD [µm]	P-A distance mean [µm]	P-A distance SD [µm]
-5	0.783333	0.0983192	3.74231	0.290066	1.46667	0.242462
-4.5	0.7375	0.168502	3.81923	0.287081	1.525	0.184391
-4	0.790909	0.20226	3.89615	0.266054	1.56818	0.273228
-3.5	0.76	0.159463	3.93846	0.320096	1.55	0.263596
-3	0.757895	0.153897	4.02143	0.292318	1.64737	0.255467
-2.5	0.847619	0.147034	4.00345	0.31223	1.57619	0.272128
-2	0.869565	0.186924	4.06207	0.262425	1.59783	0.28401
-1.5	0.864	0.193391	4.03103	0.285486	1.584	0.266006
-1	0.964286	0.219788	4.22333	0.287298	1.62857	0.308494
-0.5	1.12667	0.263836	4.34516	0.276693	1.60833	0.285996
0	2.0129	0.500494	4.89032	0.393577	1.43871	0.359578
0.5	3.19677	0.470803	5.63226	0.445262	1.21774	0.257685
1	4.06129	0.449946	6.32258	0.461671	1.13065	0.260258
1.5	4.67742	0.477989	6.85161	0.436555	1.0871	0.27668
2	5.26452	0.44613	7.32258	0.468835	1.02903	0.238429
2.5	5.56129	0.52133	7.53871	0.428701	0.98871	0.262463
3	5.81613	0.442038	7.76452	0.461554	0.974194	0.272773
3.5	6.02258	0.438718	7.79333	0.61808	0.891667	0.281215
4	6.13871	0.459476	7.77	0.582	0.837288	0.275992
4.5	6.27241	0.493455	7.94643	0.547372	0.836538	0.270822
5	6.42308	0.531645	8.00455	0.572777	0.812195	0.274039
5.5	6.42632	0.372443	7.98571	0.530395	0.739286	0.257249

## Sheet: Figure 7F
Time rel. to anaphase onset [min]	A-A distance mean [µm]	A-A distance SD [µm]	P-P distance mean [µm]	P-P distance SD [µm]	P-A distance mean [µm]	P-A distance SD [µm]
-5	0.45	0.0707107	4.138	0.41791	2.06	0.378193
-4.5	0.3	0	4.178	0.454137	2.086	0.36736
-4	0.55	0.0707107	4.172	0.457161	2.075	0.36024
-3.5	0.3	0	4.226	0.395283	2.104	0.351884
-3	0.575	0.25	4.19	0.431064	2.072	0.415381
-2.5	0.54	0.0547723	4.164	0.430832	2.055	0.387266
-2	0.55	0.129099	4.202	0.416737	2.079	0.361058
-1.5	0.616667	0.147196	4.192	0.391668	2.059	0.334874
-1	0.516667	0.194625	4.092	0.452133	1.984	0.384214
-0.5	0.684848	0.192226	4.23	0.402163	1.889	0.382151
0	1.676	0.514904	4.702	0.390442	1.513	0.32865
0.5	2.848	0.439963	5.34	0.4463	1.246	0.268712
1	3.744	0.514746	5.932	0.515649	1.094	0.301451
1.5	4.54898	0.474395	6.47143	0.440643	0.963636	0.277178
2	5.09592	0.483028	6.86531	0.492676	0.878	0.256857
2.5	5.568	0.544149	7.18367	0.505118	0.813131	0.243129
3	5.93673	0.497366	7.43265	0.457524	0.749495	0.245936
3.5	6.25	0.586672	7.652	0.53385	0.705051	0.261617
4	6.52041	0.574086	7.83265	0.537117	0.656122	0.249563
4.5	6.81304	0.586367	7.9617	0.535096	0.582796	0.241203
5	7.03333	0.60553	8.11429	0.500522	0.556098	0.218919
5.5	7.2375	0.662043	8.25641	0.612069	0.51519	0.241304
6	7.45641	0.70105	8.4	0.620272	0.498701	0.217336
6.5	7.54	0.722815	8.45897	0.6369	0.471429	0.212043
7	7.65263	0.752918	8.56579	0.704148	0.462667	0.253502
7.5	7.79737	0.719792	8.68108	0.660319	0.468493	0.23563
8	7.99118	0.803541	8.76061	0.701311	0.440625	0.235513
8.5	8.07143	0.840018	8.84571	0.69804	0.390141	0.245622
9	8.01212	0.818824	8.7875	0.802717	0.429508	0.249896
9.5	8.03	0.720704	8.79355	0.730724	0.414035	0.208257
10	8.11429	0.879273	8.84615	0.852399	0.432653	0.210543

## Sheet: Figure 7G
End-on MTs on autosomes	Metaphase no. 1	Metaphase no. 2	Metaphase no. 3	Anaphase onset	Anaphase no. 1	Anaphase no. 3	Anaphase no. 4	Anaphase no. 7
MT length in [nm]	1659.61	1318.75	456.494	1106.96	82.3681	714.657	1055.9	1029.17
	457.453	856.011	1404.02	555.055	394.989	907.911	510.743	163.789
	754.735	1286.53	226.114	1412.39	833.014	401.27	299.202	166.491
	872.027	744.498	240.32	1695.13	686.21	458.974	920.518	404.091
	985.11	933.515	482.878	992.267	232.623	280.715	208.5	283.361
	476.518	717.422	404.114	849.116	510.89	859.031	194.363	325.113
	2115.3	777.429	501.845	770.267	963.67	397.243	760.996	336.499
	933.4	777.376	865.068	1165.84	1580.41	262.13	279.836	747.724
	810.143	377.385	937.368	741.018	425.229	127.67	429.125	452.861
	1316.97	877.976	644.775	547.289	451.601	1179.62	246.319	327.095
	456.289	1348.51	1085.27	653.642	539.816	552.728	274.539	241.979
	840.281	677.773	261.825	490.273	297.162	788.077	998.429	365.374
	976.875	358.59	599.055	414.335	1694.67	688.982	1163.55	637.381
	636.144	283.66	718.097	433.917	626.717	794.111	152.813	1800.81
	1006.42	886.105	515.283	726.596	930.507	799.969	158.608	553.322
	1026.51	411.157	343.583	426.509	504.777	758.164	201.376	410.365
	868.695	302.895	182.493	407.362	329.378	758.896	846.963	456.291
	637.941	959.645	884.141	877.203	616.516	757.47	675.304	551.085
	845.841	525.703	1387.85	633.342	592.5	701.666	978.743	829.345
	592.089	518.729	1133.66	860.382	206.389	862.371	1066.28	411.105
	804.742	653.163	526.831	519.92	374.624	487.583	522.282	499.136
	1022.56	605.359	1989.47	343.155	1022.55	855.893	709.761	464.456
	759.464	377.08	547.329	261.373	627.347	380.039	786.755	269.133
	1117.81	636.523	1363.43	378.803	1343.66	281.885	460.331	437.854
	1318.82	142.664	806.375	451.952	850.496	269.659	387.813	166.41
	953.694	210.095	1191.05	609.926	667.611	182.115	227.218	226.173
	933.374	704.591	496.688	447.554	191.011	165.388	365.387	491.058
	723.037	183.912	917.614	266.398	190.893	1143.36	77.9504	2539.18
	497.365	329.468	647.977	213.056	527.836	580.61	897.785	1003.44
	1235.94	355.242	234.965	205.928	761.946	529.614	460.472	709.8
	1120.21	608.515	535.565	420.809	565.244	327.92	658.254	537.531
	900.588	564.493	580.969	171.182	234.788	3438.68	444.936	362.313
	904.615	978.439	565.047	65.1083	448.418	836.973	134.136	369.31
	577.442	1018.31	128.209	171.253	588.517	769.273	434.458	176.068
	907.094	477.042	592.674	149.398	460.846	473.901	444.14	734.924
	998.526	343.117	697.132	965.161	901.294	1167.1	297.474	668.429
	1044.53	921.306	906.517	1431.88	218.701	701.509	1068.09	255.941
	1041.82	193.031	817.981	1576.01	539.605	299.955	357.371	426.544
	829.018	1112.3	1111.65	462.027	149.749	532.843	242.605	908.189
	494.637	543.481	810.141	1548.96	269.468	183.989	155.13	331.945
	1005.7	603.112	908.405	1688.49	1204.14	345.146	743.184	443.521
	1198.92	285.761	809.245	1424.03	2252.87	944.036	739.258	355.019
	516.958	810.038	1021.49	1426.27	1495.92	477.633	521.01	1071.36
	569.424	813.536	505.057	1354.23	654.233	304.346	913.611	137.753
	532.652	1816.14	537.787	1911.7	1185.48	80.8882	2328.35	829.781
	1219.18	766.689	1355.94	778.167	452.937	672.274	125.972	268.809
	721.978	315.834	1390.23	1239.63	1072.24	568.975	680.563	653.566
	719.546	581.243	828.346	694.237	298.321	909.759	1056.3	1097.09
	413.349	352.621	646.987	1297.1	475.683	370.243	753.517	1582.67
	364.927	978.879	1628.74	1454.57	942.7	435.152	119.811	1107.89
	418.37	1009.82	1461.59	1003.01	409.935	302.967	733.934	178.79
	1073.64	95.0676	1186.65	956.678	1014.2	378.705	511.386	505.403
	756.404	180.21	535.379	1215.09	825.313	214.389	583.963	885.827
	530.136	425.314	304.128	574.307	510.829	475.619	282.803	777.248
	336.928	385.275	1094.48	519.925	645.471	251.195	326.024	205.827
	700.55	577.296	1185.75	792.266	984.737	598.641	550.091	379.291
	684.347	1091.25	821.799	841.71	912.485	168.454	1831.44	1176.59
	1025.64	562.85	629.52	861.787	1277.14	54.6677	213.848	352.187
	542.747	279.117	532.68	618.836	253.972	581.935	420.352	465.556
	730.365	263.368	663.384	281.445	111.601	179.648	625.923	754.931
	349.118	221.407	311.094	1232.05	1054.07	299.888	676.037	1275.9
	853.793	1373.49	453.611	623.778	457.915	333.811	1505.22	944.698
	327.795	849.659	683.681	1212.59	786.393	119.264	614.786	758.815
	1283.69	841.079	126.236	552.406	665.301	298.899	792.934	413.392
	631.316	998.485	646.032	344.376	799.26	163.459	875.81	914.976
	707.089	154.652	912.349	428.698	1345.54	247.848	492.345	806.49
	980.913	1012.61	899.133	296.953	1443.7	570.928	883.989	224.784
	589.41	243.624	709.548	208.338	890.447	416.674	444.956	1307.78
	618.976	501.595	1518.09	503.68	286.13	1265.22	358.433	756.384
	828.601	338.026	612.38	618.06	328.312	1857.56	335.227	578.27
	572.439	344.442	353.827	132.114	491.261	1899.28	204.529	521.891
	1213.67	117.967	561.664	334.816	227.773	546.457	190.531	1058.6
	787.221	417.702	1132.52	449.112	408.104	383.039	386.938	639.381
	697.597	695.438	754.598	269.241	1134.85	1073	565.608	938.676
	813.22	913.119	653.615	229.017	623.744	1167.36	358.675	162.682
	647.636	442.991	1092.79	1130.48	877.676	1196.07	895.852	846.333
	458.638	991.141	323.641	389.7	818.063	1070.43	978.988	227.142
	721.672	277.645	981.392	1214.79	632.3	535.288	653.639	364.445
	877.982	123.257	258.792	601.455	946.949	253.24	591.671	961.009
	732.008	1090.89	483.102	665.361	705.851	134.693	707.358	323.184
	849.438	1790.32	504.618	729.689	168.106	174.993	1411.65	168.156
	808.49	1336.05	378.256	821.31	382.226	164.184	304.385	2165.31
	275.388	780.127	245.486	1260.92	516.292	660.172	550.524	539.501
	421.815	985.018	678.075	673.726	289.922	355.126	903.972	766.363
	553.57	564.322	575.409	1269.12	535.093	541.164	554.193	426.189
	633.043	639.072	738.022	1083.7	463.357	289.507	918.617	1330.35
	893.195	1464.78	618.625	1150.2	934.308	1040.5	281.099	593.495
	197.996	802.261	1231.91	811.223	321.883	251.973	354.84	1255.92
	479.526	664.54	716.453	910.639	464.84	481.097	312.894	926.322
	301.18	1307.62	640.689	885.519	752.449	717.585	366.627	829.382
	522.214	628.54	434.898	772.946	1158.45	150.11	280.789	2060.16
	451.497	770.737	1147.15	1045.6	523.006	225.399	958.822	337.93
	827	438.078	440.14	1152.01	146.568	1999.27	376.6	214.074
	620.696	541.462	554.495	761.741	261.772	1048.89	215.689	261.821
	645.511	1234.67	282.324	803.96	320.101	191.863	948.781	126.733
	774.728	791.68	482.353	1339.68	793.561	1212.74	676.037	421.521
	999.807	1006.65	276.493	346.45	1077.72	709.753	244.397	285.33
	880.414	365.916	215.637	805.171	687.934	229.937	328.331	250.272
	1048.38	512.379	129.525	564.021	790.863	957.256	567.779	384.265
	855.526	875.959	313.798	406.475	349.861	91.5287	526.716	765.591
	1425.19	675.501	286.705	574.612	493.621	966.605	653.706	195.843
	1020.05	734.793	348.91	664.32	615.735	993.365	751.643	119.387
	554.952	377.674	400.21	509.315	412.154	671.714	574.867	582.513
	366.585	728.593	506.915	385.778	197.568	400.832	162.789	293.205
	810.245	530.8	799.024	658.261	223.658	516.919	453.979	818.44
	438.29	577.687	1400.06	547.633	291.484	1099.54	769.644	423.93
	737.32	249.183	307.438	247.484	600.609	609.763	555.558	942.131
	379.752	526.387	470.015	279.742	126.553	1248.24	91.2632	726.739
	388.642	332.609	663.636	204.636	720.081	193.754	736.999	480.466
	1014.77	316.153	580.218	122.878	921.485	476.012	592.769	759.514
	709.541	508.09	112.022	168.777	1312.61	446.542	355.847	782.831
	855.701	569.226	479.453	1673.02		317.469	80.9742	211.615
	679.9	478.385	273.184	1276.3		558.994	436.119	683.555
	605.192	1145.73	479.249	1248.18		129.898	276.195	1018.84
	578.09	316.126	1308.84	1592.75		504.333	283.92	945.172
	466.136	500.506	856.189	971.097		164.633	1062.61	876.431
	791.264	252.475	994.174	452.278		787.31	739.327	808.905
	831.117	704.339	322.268	499.684		576.454	471.959	1453.76
	728.242	373.297	440.957	474.881		405.941	371.281	773.578
	672.429	379.079	641.875	840.341		781.817	1054.63	743.137
	798.145	565.732	476.844	810.889		1022.87	426.283	182.099
	685.84	524.062	1096.31	821.952		1928.51	354.755	402.521
	1140.26	968.305	416.835	334.79		416.056	218.269	413.562
	878.439	654.265	276.069	564.356		2203.11	412.852	705.08
	921.904	454.697	500.825	382.223		343.762	216.727	1043.05
	1031.5	753.505	305.002	237.409		1351.69	581.976	396.189
	1171.48	750.853	834.915	246.757		357.916	935.535	140.265
	1440.65	259.62	590.523	484.869		1219.01	375.105	340.663
	781.45	534.006	299.147	439.001		326.135	1292.32	493.883
	629.501	602.808	908.135	403.227		610.965	944.365	589.337
	598.795	92.8658	567.949	403.82		451.717	735.429	1010.57
	906.478	229.637	830.734	250.696		204.477	142.751	673.995
	831.823	198.775	1532.89	304.239		1391.61	1197.61	1038.51
	972.937	772.84	1219.03	190.407		376.357	655.453	469.453
	872.223	558.387	452.073	413.4		891.227	166.455	447.413
	544.068	633.917	479.098	155.337		1028.46	437.659	634.805
	655.789	796.61	400.397	237.403		414.03	327.211	606.721
	1083.48	209.335	1860.66	238.263		1419.23	533.433	274.769
	849.411	405.94	427.982	632.861		643.94	568.054	428.543
	472.747	622.37	312.585	157.505		324.015	109.608	299.321
	1323.36	385.267	381.426	401.644		943.605	736.951	356.129
	574.353	636.846	768.631	92.019		1490.95	162.499	326.541
	1153.86	496.812	856.186	1170.3		1067.51	583.58	315.633
	768.12	906.945	797.477	641.511		1105.51	895.897	806.529
	412.14	858.189	862.57	1574.94		454.674	811.189	398.127
	622.794	224.47	585.15	1074		875.737	817.921	181.834
	1046.05	647.031	482.965	1045.75		684.632	301.766	1963.55
	88.6989	583.758	565.522	547.852		517.03	563.762	450.922
	1450.17	253.424	190.475	735.407		990.467	209.004	1913.79
	743.288	687.226	306.024	569.833		1037.46	320.524	743.221
	530.258	1221.29	1066.91	1237.53		783.023	782.919	771.816
	540.953	382.306	767.07	507.713		469.154	1051.51	977.207
	1391.1	500.68	1101.53	701.377		170.591	516.383	791.13
		767.405	439.073	404.847		554.733	167.207	982.578
		753.672	809.65	1094.85		184.842	575.744	820.617
		1057.85	720.434	651.181		590.43	574.686	738.51
		243.803	428.005	633.735		726.602	411.125	732.366
		453.073	287.208	1174.92		675.083	440.175	911.707
		416.205	802.842	498.79		927.055	267.201	555.582
		805.263	573.143	701.013		1432.3	719.039	583.509
		948.545	387.711	356.002		481.436	857.333	427.952
		139.849	1445.34	903.61		1322.72	738.775	330.382
		160.603	179.147	635.596		589.65	423.858	553.688
		343.486	962.586	1095.77		846.845	310.586	340.761
		1001.38	310.855	1015.24		1107.21	643.942	424.15
		1042.99	1435.5	418.138		262.996	339.667	624.139
		447.982	345.267	760.613		620.348	449.382	516.46
		650.702	267.07	367.668		546.673	522.852	267.022
		583.311	744.396	239.024		583.978	189.058	440.558
		698.808	455.889	238.611		881.447	915.864	389.06
		589.634	754.367	260.926		562.625	2197.34	556.034
		360.726	436.32	449.557		297.484	384.432	374.468
		456.751	486.628	441.487		355.049	2092.06	272.167
		335.184	698.022	577.098		406.617	635.997	297.825
		343.913	557.675	858.581		141.225	839.057	411.133
		138.986	1569.06	721.806		2437.23	1047.37	385.171
		513.114	538.494	510.705		458.877	555.513	1037.98
		829.635	733.663	715.642		250.946	902.446	220.061
		379.498	261.969	192.492		593.238	595.656	490.49
		371.169	608.041	531.695		669.003	513.879	780.844
		687.661	737.07	666.346		735.843	97.4025	340.179
		420.414	530.44	379.863		926.141	1025.03	377.602
		117.731	554.183	198.332		469.122		229.711
		1062.43	1284.33	251.873		1026.45		552.316
		150.586	204.798	718.879		564.073		242.765
		175.037	762.969	269.245		557.028		647.106
		500.417	283.943	638.839		362.717		1217.72
		230.505	556.465	126.242		386.863		1019.95
		498.094	456.89	673.933		1108.91		813.691
		131.997	877.169	731.341		389.027		191.938
		212.48	1379.51	423.357		425.058		994.12
		609.638	1231.84	269.874		206.01		225.478
		403.66	1516.98	172.854		273.44		446.309
		306.695	585.407	311.882		414.733		1323.95
		279.053	316.602	146.062		241.434		2672.69
		362.497	308.825	1281		780.089
		592.991	485.774	345.085		1107.48
		935.115	567.02	715.829		1588.41
		968.643	197.68	885.135		336.716
		924.942	113.094	476.639
		411.56	308.366	321.174
		447.08	533.983	1061.84
		561.944	752.805	1517.41
		650.673	1596.39	773.675
		377.056	185.95	784.053
		489.973	755.564	627.647
		622.328	359.633	1611.66
		480.242	1094.57	1983.29
		733.003		1699.17
		422.778		1651.74
		654.016		1315.21
		289.413		520.363
		234.631		801.074
		751.031		484.633
		785.33		536.46
		903.219		742.428
		1614.47		908.992
		1048.58		619.436
		389.058		338.193
		1042.98		629.04
		1890.62		950.29
		1451.87		1013.91
		509.657		698.795
		627.335		129.656
		590.714		156.981
		449.476		820.462
		515.333		857.987
		460.158		209.125
		410.406		761.696
		978.064		166.521
		74.5242		528.325
		200.622		1049.96
		869.249		972.855
		821.41		1403.51
		515.251		367.164
		842.142		711.58
		1239.16		601.55
		279.105		433.555
		813.565		423.38
		774.046		452.593
		316.189		668.776
		206.047		396.857
		169.707		490.379
		329.777		108.824
		270.861		370.476
		981.059		287.148
		900.662		574.309
		459.329		436.038
		598.844		1036.24
		1002.97		526.105
		381.62		328.588
		405.322		373.165
		459.037		293.552
		227.572		475.012
		600.68		567.651
		316.55		274.909
		1713.43		270.724
		363.701		568.317
		738.765		1507.62
		214.343		1333.76
		848.22		1118.92
		873.917		1119.69
		540.26		1039.48
		803.68		629.91
		1060.26		1010.78
		494.966		781.962
		404.302		742.424
		602.34		546.663
		608.375		355.587
		1017.26		1362.35
		360.596		379.631
		1087.01		812.466
		1117.51		600.928
		217.105		825.157
		616.261		791.958
		444.357		1116.51
		978.45		933.186
		399.156		663.223
		428.819		404.615
		1418.29		285.452
		892.957		394.166
		119.049		196.015
		608.284		466.552
		267.195		1222.78
		100.412		372.67
		225.516		2176.06
		528.813		1188.02
		825.967		1054.87
		361.121		719.665
		1262.58		797.117
		230.353		467.089
		752.517		643.902
		268.182		721.266
		111.717		386.982
		213.511		593.589
		296.464		780.743
		869.035		465.194
		513.188		565.668
		1158.35		280.34
		556.838		658.555
		476.764		329.981
		707.045		580.437
		1117.55		341.865
		1470.76		69.5253
		489.121		222.877
		920.314		715.988
		782.846		225.312
		409.061		407.276
		202.845		667.537
		519.956		238.285
		922.996		272.526
		1116.96		94.0686
		369		828.071
		1090.14		753.285
		283.824		590.037
		905.929
		308.474
		636.249
		416.488
		305.313
		547.965
		990.023
		886.418
		982.898
		771.17
		351.29
		496.967
		1162.97
		262.243
		529.531
		203.069
		729.395
		874.204
		991.863
		847.223
		1055.98
		563.721
		459.022
		903.751
		682.141
		1199.11
		470.566
		628.339
		631.733
		353.572
		959.706
		345.758
		822.608
		262.747
		428.728
		525.588
		248.85
		514.546
		874.231
		757.146
		404.424
		919.606
		334.851
		400.737
		747.427

## Sheet: Figure 7H
Lateral MTs on autosomes	Metaphase no. 1	Metaphase no. 2	Metaphase no. 3	Anaphase onset	Anaphase no. 1	Anaphase no. 3	Anaphase no. 4	Anaphase no. 7
MT length in [nm]	1407.31	1807.33	1407.98	3128.35	1009.02	1525.38	1686.06	2966.49
	2280.58	2007.25	2448.36	2024.52	1706.68	1216.08	1554.19	2181.8
	1730.13	2308	1368.27	1100.29	841.977	1036.69	1313.97	1364.07
	2077.95	1559.81	1488.25	1961.83	753.602	1040.61	1194.85	1110.35
	1381.21	1697.36	760.984	2449.03	1354.66	961.976	733.786	926.733
	2042.05	1920.02	1973.59	1510.95	1085.18	980.471	1477.26	922.428
	1437.45	1630.78	1414.55	1160.52	1711.22	715.432	1442.7	678.317
	2049.29	1589.81	1065.71	846.65	787.622	1441.45	1443.84	840.369
	1315.11	1827.54	692.907	1761.45	774.296	2386.77	823.216	947.084
	1775.51	1968.15	1808.97	2027.98	592.939	871.742	2761.51	732.008
	2304.18	1263.24	1664.04	1247.65	878.342	1237.05	1126.92	867.947
	1253.1	1821.8	2037.87	1085.14	1734.53	3534.27	1423.22	1056.6
	1230.28	1392.97	718.181	2331.39	1953.94	927.364	360.382	821.848
	2206.43	1104.98	725.785	1314.81	1046.04	3613.81	2169.26	598.746
	920.006	990.666	1946.25	423.014	279.227	3033.2	1038.75	1504.75
	1247.51	1609.13	3068.01	1021.62	737.788	679.107	2100.07	591.978
	478.06	810.663	676.658	1098.53	854.433	1117.92	1458.91	831.135
	604.035	115.792	1220.8	1457.16	508.838	287.501	1037.45	525.613
	1506.31	1065	1051.94	1263.09	275.12	1724.6	62.9492	405.703
	563.122	1422.1	213.321	1157.22	565.759	192.272	933.439	367.882
	1586.78	744.233	1282.61	911.721	585.136	372.338	1161.47	476.422
	631.112	711.667	546.789	427.497	1579.2	415.117	1360.47	529.16
	1173.37	474.665	1408.14	1588.37	1242.66	964.233	848.015	927.904
	1276.43	841.333	1831.94	1995.37	1313.21	2043.87	1075.06	548.566
	1878.38	977.175	1052.99	1444.37	290.897	1981.72	1713.34	952.059
	1458.5	1257.05	814.634	306.213	267.046	2385.55	2354.28	675.072
	1104.79	751.723	1043.74	3187.66	807.366	3385.08	1330.24	1151.86
	989.525	583.111	983.351	1282.03	3177.65	1950.27	1406.68	248.846
	2127.37	210.163	1239.98	1033.7	986.464	826.587	734.789	530.592
	1146.72	375.703	1396.57	858.572	1731.53	3036.07	746.795	478.952
	2128.82	773.031	1117.91	1961.64	254.883	1949.55	1987.43	658.657
	1048.64	526.279	1645.25	1152.67	974.013	3275.97	1746.17	755.658
	1488.43	514.958	1363.6	1347.88	1459.26	1175.98	1147.89	348.165
	1186.71	1496.66	508.925	943.817	1609.71	3648.18	2366.75	309.596
	998.725	1492.02	222.4	631.148	956.857	3811.38	3515.83	184.714
	1285.22	1575.85	1130.91	194.19	330.994	2960.22	2606.4	540.582
	589.99	1138.29	231.067	733.364	1425.95	488.47	1663.22	392.109
	849.735	1831.67	2113.64	991.242	1344.37	1456.79	1817.31	308.84
	2514.86	1297.84	2058.15	777.258	1008.05	3318.41	1835.8	502.255
	698.982	2685.11	1703.06	718.352	2854.71	4127.61	2686.94	701.42
	2200.51	1687.12	1926.53	1432.43	2216.95	1814.18	2683.88	115.541
	1664.17	1770.84	1918.68	788.317	2211.08	2342.14	4309.83	687.762
	892.35	1571	1323.28	2479.16	1266.71	2152.8	3360.47	99.5785
	1999.91	1973.47	2213.69	821.068	395.273	1306.51	1800.97	404.593
	1227.21	1828.98	1268.22	1772.99	1579.35	1362.69	1028.01	287.46
	3475.48	891.431	3436.74	2871.47	854.894	3013.3	2269.83	595.743
	1229.51	1821.93	1872.53	477.057	832.095	1971.34	806.163	264.68
	2073.78	777.796	977.73	1973.68	1267.57	891.992	2599.19	428.594
	706.804	840.404	2153.25	2093.61	1110.53	327.288	1244.45	271.008
	2470.21	699.129	758.429	1208.98	812.117	1052.37	2111.49	257.426
	1798.4	157.008	1743.6	2295.22	481.479	2130.66	1918.52	295.24
	777.527	1519.89	1474.26	1742.28	821.04	246.697	504.977	1555.75
	1694.25	1236.5	567.885	1531.7	1175.52	1126.22	2822.06	351.065
	1750.85	935.903	686.7	1704.02	1874.03	660.729	3433.49	540.912
	2466.88	1358.06	789.69	994.31	566.302	1670.14	1769.06	2332.81
	1465.66	1421.25	1913.34	1836.54	1305.85	1711.03	2368.41	3096.84
	2043.72	1020.59	1536.08	1681.9	1824.64	1166.06	2404.1	1851.2
	2059.44	797.266	1114.73	1004.82	1072.98	1607.35	1920.33	621.006
	1750.16	1476.77	1277.05	1651	1383.15	317.52	795.987	250.988
	1861.3	1358.01	836.54	1612.65	1785.54	446.163	972.245	695.903
	1552.17	1783.02	827.426	1488.62	1333.37	406.531	1671.23	1180.25
	667.2	732.012	1115.88	1252.24	665.762	1369.25	969.271	717.275
	975.466	1091.11	1966.56	1318.36	2478.79	1765.4	1119.38	2072.16
	1650.71	2166.06	1008.67	1680.33	711.815	1998.36	558.746	1941.04
	541.029	714.634	168.293	1259.45	1813	623.852	1306.45	1739.64
	1146.54	728.53	1250.52	631.855	1456.36	1263.6	1213.97	1889.12
	708.8	1844.33	911.926	950.835	850.505	716.123	583.826	1324.63
	1059.13	781.444	777.016	927.32	1484.44	1033.02	737.222	3371.79
	1722.03	1030.84	1503.94	1717.8	968.051	2775.07	1941.92	2261.09
	728.939	915.888	1648.31	760.711	1040.34	1597.34	1885.23	2840.63
	1411.59	555.003	3300.22	1505.59	1680.67	1510.34	903.222	1280.02
	581.562	1883.64	3357.49	1303.14	2399.98	1340.48	1562.13	2683.17
	965.656	1054.34	1842.49	609.69	2241.76	1503.7	1220.77	2607.09
	633.173	703.37	2201.23	853.499	2371.24	2089.95	3073.12	740.351
	914.703	521.169	2037.71	1416.36	1180.77	3295.37	1560.23	2197.74
	922.049	521.229	2940.96	1086.52	1422.91	2212.3	2231.41	2303.3
	362.198	346.3	1132.07	244.322	2028.39	3444.29	1623.42	1668.66
	1191.71	1121.11	2059.8	2870.63	1295.48	3255.02	2244.04	1040.39
	1175.39	717.356	2045.07	1123.29	2862.6	1677.1	3156.82	246.716
	492.306	348.909	2014.43	1585.36	864.553	3819.06	2090.17	2461.94
	339.762	233.423	940.646	2335.94	551.677	4503.35	2559.49	855.187
	1074.11	336.879	555.954	238.866	780.938	1896.58	1377.87	2654.52
	188.036	863.378	628.8	294.798	1399.75	1663.31	3926.65	1127.83
	2059.21	273.816	1253.46	1548.7	200.719	614.761	1959.25	1911.98
	2209.43	1369.57	598.745	2132.9	887.883	1263.31	1589.87	2012.44
	1637.59	548.744	1073.49	1201.06	685.11	1682.46	1334.04	836.097
	1957.15	2626.85	402.972	862.576	2143.58	803.516	1699.7	1093.66
	1656.46	1254.61	966.469	2001.3	2061.77	1294.87	742.809	1752.93
	1275.76	1484.32	1589.54	909.315	2504.19	2165.13	1215.65	672.532
	591.161	2070.91	612.726	2202.93	996.46	2189.88	1218.73	313.622
	631.033	1186.41	928.031	1217.4	341.207	1139.36	1933.28	2676.26
	2051.87	718.117	1212.67	1745.23	166.589	2426.24	1496.22	301.22
	249.446	1826.15	194.357	803.232	1858.81	1984.3	838.047	582.987
	1575.9	126.659	1676.77	2085.38	2475.17	1764.66	570.875	1571.9
	258.241	111.606	3510.25	988.31	1319.97	1770.86	647.208	1950.29
	639.616	393.339	781.418	768.17	1148.27	1737.13	1460.87	826.254
	1437.93	1422.14	1352.21	1695.42	981.429	1101.96	837.98	285.65
	1136.99	2287.56	2139.24	2088.79	1904.79	2063.59	801.404	219.206
	562.118	1333.11	3060.99	1894.7	1064.16	610.991	1256.68	1549.08
	802.155	872.883	1207.54	564.979	661.517	1077.38	1821.19	1795.81
	801.839	1314.51	910.744	1707.2	338.35	2315.37	1923.28	511.819
	1008.09	1327.68	2798.69	537.376	2486.37	1556.57	785.249	887.168
	1263.05	764.324	1332.1	1105.63	432.255	1909.3	331.465	1039.98
	1526.18	1436.11	839.254	1363.93	972.912	672.52	490.109	442.276
	874.773	1388.09	462.772	1826.76	547.166	1656.94	2837.8	248.181
	676.31	2334.1	683.571	969.533	2258.19	1085.09	1015.41	645.306
	1490.79	439.73	2115.29	313.438	2152.67	544.517	173.667	600.82
	2406.97	1712	2327	1280.44	1089.75	857.963	362.84	3512.98
	1171.74	1286.14	1627.97	1134.13	1786.45	2460.7	417.848	1762.19
	2261.76	1290.9	2063.09	1369.33	796.433	1461.35	1035.48	395.979
	2366.3	1443.4	1892.03	963.892	1540.68	2242.38	2644.58	583.239
	1849.67	1837.55	1215.75	134.519	2310.5	2894.92	1329.42	2141.62
	1484.62	2539.35	362.294	621.994	900.829	2890.78	1209.05	569.54
	707.497	517.156	2098.67	298.054	1598.55	946.243	1142.31	3304.92
	1725.27	1487.6	340.688	2815.67	1818.97	1530.04	1306.3	1554.78
	3077.02	909.312	700.388	843.544	2708.11	1361.23	1284.39	1781.06
	1697.25	1378.39	936.793	1690.64	2434.1	1719.13	1299.73	997.47
	2653.64	1456.78	1561.42	1715.9	1064.28	2011.1	1245.04	477.029
	1744.46	301.128	648.286	2843.51	1060.82	675.94	1075.74	1318.8
	2519.61	1138.26	965.24	1908.78	2565.94	1975.63	1597.51	1144.32
	815.606	364.094	979.148	2246.55	681.258	2735.89	1361.39	1296.42
	750.575	456.929	957.611	1328.33	1413.63	1200.79	1205.57	775.915
	1376.78	1163.71	1243.81	1396.64	2059.92	2053.45	1248.11	865.048
	1142.27	588.454	164.305	2291.87	2251.15	806.303	1163.78	550.479
	1970.26	1379.84	1013.24	1378.05	1752.21	2191.5	2723.49	778.553
	1321.3	224.468	1070.86	2301.43	1788.37	2530.64	974.717	628.201
	1167.95	1796.13	443.313	785.545	1881.32	882.875	1496.87	352.221
	662.405	607.6	1138.71	2126.78	2099.56	1974.4	1753.02	739.906
	1616.87	1529.51	1559.65	1482.13	2910.81	2837.87	1549.86	654.03
	965.514	640.552	1477.11	917.491	953.193	2525.34	2525.48	646.678
	793.65	161.225	421.029	1578.39	1650.04	1991.72	2342.81	138.515
	976.722	335.753	795.851	1774.17	1644.28	2962.2	3506.28	379.199
	1221.57	426.323	1252.76	1420.18	1132.97	1680.7	3340.36	154.558
	639.298	623.605	579.781	852.89	1393.24	2697.32	2357.13	479.627
	1121.26	1421.88	128.114	1691.16	400.207	2494.63	1365.69	1456.18
	995.26	2597.53	1377.93	2453.32	327.381	2095.89	2065.63	3312.81
	1438.45	1814.21	2257.23	1380.63	508.86	586.098	2341.08	2330
	1259.42	348.397	717.872	1765.83	305.46	1038.51	1868.18	1207.61
	1774.28	823.405	1231.49	602.444	1897.59	1347.41	2897.92	644.874
	1879.69	1672.38	731.183	908.876	1623.96	2527.37	1078.63	1685.92
	1181.99	710.79	633.12	1239.69	652.759	643.168	2930.69	3087.7
	1711.3	1476.18	1158.12	1315.6	4001.04	810.49	2471.79	988.624
	1546.56	1255.22	1564.95	1153.76	978.984	1229.85	317.77	311.654
	1155.43	1312.54	1114.26	832.558	1398.94	1012.76	1345.23	1160.41
	1609.49	1463.09	1546.45	1276.13	2405.37	1602.66	1416.03	731.181
	3331.66	821.419	1985.01	533.63	1836.71	1009.28	523.003	1776.36
	2036.28	812.223	298.856	710.427	225.458	1265.12	795.93	896.28
	1484.27	996.195	1265.82	1400.45	1203.25	652.408	760.796	704.27
	1672.22	1034.27	1216.08	1261.83	1600.32	267.313	885.9	1387.8
	934.15	1749.9	1191.12	1458.46	1456.05	1669.46	1311.95	767.759
	926.102	1211.6	825.817	2498.15	4101.96	816.013	273.8	1603.41
	911.152	1150.48	1571.06	2554.93	508.581	1162.64	1252.76	1456.95
	1159.51	613.625	744.348	1632.52	2598.75	2669.09	762.32	1110.76
	689.159	528.892	1054.69	2344.17	1340.06	1522.91	1218.65	1021.65
	764.409	268.2	496.744	2099.52	2952.32	1405.52	1508.37	535.088
	569.563	1820.59	2042.3	1416.04	1861.58	1981.38	743.971	1501.56
	313.585	1511.76	3266.33	1499.26	1498.46	795.572	564.79	2261.49
	734.862	711.018	1623.99	1752.97	2743.01	1896.61	774.551	1930
	607.863	1608.7	1057.12	936.158	1345.04	693.665	1048.34	1550.41
	1469.36	595.019	1432.77	1348.1	3129.23	429.688	555.607	281.602
	1233.18	585.332	1893.62	1814.22	376.072	2016.59	1192.37	296.19
	539.929	524.646	1248.82	1876.59	1877.88	132.146	930.298	607.236
	996.714	482.313	1703.83	924.674	698.983	711.917	1135.39	271.126
	1211.16	1396.44	1812.46	1699.69	370.908	1016.41	2286.9	511.218
	807.816	1301.38	282.535	1767.79	1388.9	1207.27	1306.48	608.108
	1080.98	764.85	810.008	2279.96	872.192	627.013	1287.85	291.403
	1301.24	643.653	1662.16	658.232	2420.93	893.56	1333.73	730.968
	1015.48	126.834	2710.91	461.629	1397.33	891.034	1809.06	981.625
	2047.71	453.301	1272.84	1269.97	1832.8	1147.49	1179.27	894.193
	961.042	634.177	2661.67	1074.69	1017.68	1323.86	1509.55	833.178
	1502.01	416.251	2009	1666.84	684.451	720.708	1162.95	299.806
	1444.93	1926.44	1849.27	589.645	1898.79	505.496	1828.33	251.676
	1354.07	888.323	1206.84	143.6	1090.94	2761.87	1838.63	853.086
	1529.23	1572.8	1228.57	1687.88	2050.53	1387.32	1484.48	888.299
	1618.08	868.962	514.09	448.861	798.518	1382.42	1728.22	360.199
	1012.24	1429.09	1186.03	657.005	805.573	3092.63	2065.31	625.517
	3019.07	1750.75	914.356	136.792	1618.18	713.188	1040.32	550.409
	1413.04	1553.47	650.006	740.197	897.53	1952.26	2212.09	259.72
	1015.53	1612.27	1582.27	1085.95	1327.98	2670.73	1789.99	372.397
	1778.67	806.319	817.881	631.671	1052.13	1225.54	2250.43	555.652
	845.278	2573.58	579.815	1303.5	1946.71	1492.92	747.196	413.366
	1099.77	1529.18	644.692	1798.33	1107.93	2880.57	1647.37	782.463
	1058.56	2163.44	1105.46	1582.39	626.329	1698.86	3478.8	887.947
	818.804	1365.25	1178.59	1883.29	1752.12	2085.46	1484.46	259.375
	1912.08	1839.04	2011.21	1069.81	1706.89	1846.56	2698.88	1164.28
	340.87	1224.61	1375.08	2701.25	685.381	1293.79	1754.82	252.686
	1849.65	736.928	2118.83	2624.08	965.377	1756	1849.93	255.092
	1603.6	1430.61	725.186	2144.74	528.267	1431.03	1306.69	206.721
	3403.88	571.274	643.274	1510.87	1983.78	2613.27	2228.75	548.476
	1723.93	723.693	1566.77	2651.3	2228.57	1963.09	1559.44	360.665
	1731.62	375.273	1884.99	1961.96	1985.37	2018.94	1455.51	507.163
	723.207	827.747	1345.61	1449.88	2512.12	2746.44	681.517	429.693
	939.243	1099.45	675.09	1496.83	1770.39	2226.97	1519.41	827.693
	1374.1	79.5624	1656.3	1903.16	1361.94	2510.7	522.349	583.073
	1531.32	470.917	2114.65	1274.56	2815.75	2948.96	1071.85	343.128
	1706.46	829.272	556.762	1094.37	3398.68	3077.31	265.002	524.08
	775.957	375.935	251.543	1158.91	2858.2	3426.72	1382.04	371.285
	820.131	414.403	1315.01	1242.25	1506.46	2720.66	1413.55	388.246
	920.058	1358.2	2081.08	1460.34	845.621	2739.12	1549.04	427.835
	1526.17	930.193	1817.65	773.9	2725.48	1353.19	603.446	510.448
	793.677	277.291	384.822	1274.94	2515.53	2610.65	1992.48	871.771
	1061.05	175.417	1047.5	1422.36	1767.49	1698.34	1517.72	1542.81
	1457.5	246.554	1476.86	1031.83	1136.14	3188.95	429.233	453.155
	1231.03	747.011	824.528	865.042	1244.6	1183.77	1712.96	900.002
	1264.55	633.691	733.698	1350.69	1012.59	1092.84	1890.29	896.64
	2638.77	751.213	1301.24	1921.34	602.195	2965.21	2264.85	759.04
	1616.46	750.337	1227.85	1602.69	2863.31	1142.15	107.558	193.857
	1255.4	2126.68	1168.36	1086.48	982.507	991.765	1870.59	444.408
	483.753	1070.32	1551.19	1066	1477.99	307.064	1581.98	734.01
	1159.63	821.834	1403.28	976.94	2601.74	2900.63	1053.75	698.666
	1594.23	321.111	1482.4	1841.01	1185.1	1286.27	1641.08	195.742
	1647.1	2134.4	842.496	2468.57	1060.78	676.028	1650.59	836.752
	1876.45	630.763	541.524	997.525	1126.89	257.757	2032.16	675.074
	1018.02	1949.67	200.655	1313.85	1976.83	1112.8	947.401	493.719
	290.423	822.781	1267.77	1485.17	1468.71	832.163	2390.37	461.26
	2019.07	455.168	839.284	783.345	1556.68	1029.97	1327.18	478.784
	2329.89	2214.88	716.061	811.405	895.398	2115.08	2242.32	1019.68
	2205.47	1475.71	145.942	1639.33	869.576	430.848	2227.93	298.879
	1469.46	1760.97	2756.39	913.037	399.992	717.71	607.137	1350.59
	1065.7	498.167	446.882	774.908	252.081	953.601	1631.7	1603.24
	783.986	167.308	462.208	1509.89	1393.27	1036.51	1596	1248.34
	1777.15	302.772	558.786	1138.9	1452.94	3210.71	800.767	2662.79
	1116.26	1185.64	1545.34	290.253	1777.56	862.172	1309.41	1872.34
	1191.77	593.337	1875.01	386.436	1576.32	783.769	475.782	1484.95
	1229.45	1958.94	1664.11	904.626	1365.29	109.646	1063.72	1444.01
	1251.87	1366.01	1499.55	333.375	447.827	303.149	1770.64	1332.02
	1087.76	678.802	604.125	2480.41	1278.83	942.535	1175.9	2164.67
	1305.82	508.091	1271.91	546.443	932.271	2787.93	1515.02	1296.15
	504.564	962.317	404.42	1387.28	1721.05	1204.92	847.424	2159.61
	1965.95	90.782	1445.07	1478.52	3554.39	1032.15	1338.6	1844.27
	1223.34	254.418	385.268	2231.49	1376.56	1952.89	1029.44	2569.73
	1706.82	1227.91	2798.18	253.919	1358.54	257.196	1147.66	1106.21
	1369.74	1254.4	1837.82	2282.47	1677.66	1057.63	970.341	2038.66
	2522.62	1033.11	276.059	386.802	1765.23	1128.3	2046.16	2112.22
	2529.18	2619.1	435.984	2436.1	968.923	1281.06	1133.14	809.155
	2510.59	2130	1177.68	1516.12	751.403	2061.2	2736.94	281.576
	1074.53	541.098	447.895	1127.09	1977.73	1705.89	867.295	707.019
	2240.41	806.351	1344.62	1935.42	3319.79	2244.05	1632.35	572.986
	1407.97	1387.16	244.782	500.348	2332.47	1270.87	1982.9	753.2
	1526.87	1256.03	328.229	1649.79	1476.01	3075.99	1941.43	949.406
	1723.49	1702.89	1284.03	371.788	2269.06	3624.89	236.734	726.376
	1729.35	1395.28	871.224	2566.12	2257.44	572.369	773.31	886.909
	595.624	1666.26	407.013	2621.5	1817.94	2974.22	2282.72	2413.57
	1506.49	707.327	254.998	1907.45	2101.51	2597.08	1636.64	1567.08
	1874.6	1011.94	1387.33	1017.42	440.482	1832.96	2244.9	938.148
	1880.11	2943.29	630.281	1358.07	1302.09	337.709	1476.91	3047.99
	2253.43	644.674	2373.8	2436.28	3391.7	184.423	1726.98	986.266
	631.398	1138.11	1058.16	1527.46	2509.11	174.748	2276.07	824.542
	1137.42	632.278	864.756	1769.2	538.595	1413.62	2563.68	1139.39
	1026.8	594.77	1450.77	1481.67	800.327	406.194	2184.1	1691.24
	933.345	407.805	559.712	1885.84	893.752	1736.43	2027.17	1966.67
	1712.67	1284.66	1771	1771.26	371.581	2166.86	2130.64	690.602
	435.199	1314.11	934.767	1479.05	1065.46	2833.12	1265.37	362.042
	175.221	609.968	503.839	1106.76	784.124	1651.22	1802.66	956.215
	1115.93	548.916	1223.89	1216.13	449.268	2089.78	1242.79	1616.76
	1214.93	888.752	1776.34	944.28	310.696	2142.9	1363.59	2552.8
	1556.44	1020.54	733.759	1270.21	1686.16	1603.28	845.285	162.051
	1825.71	1803.96	675.348	992.613	854.7	1647.53	1066.19	3476.84
	511.759	556.625	2068.86	1460.28	2319.01	1817.44	1151.68	1640.12
	1339.67	885.963	920.011	1149.1	730.606	1109.52	1459.93	963.854
	1021.8	1273.04	1675.47	1930.01	472.812	657.654	321.332	2225.43
	667.576	804.689	1558.57	1042.31	1290.76	1024.48	2036.11	2195.39
	1160.54	686.158	1486.17	610.395	419.069	1035.53	525.258	1856.65
		211.233	1259.4	847.384	750.328	1465.44	1157.55	1311.78
		1073.3	1328.11	1505.47	267.895	803.491	1433.26	442.474
		629.524	471.202	1799.36	1271.19	837.077	1085.6	293.187
		805.611	545.179	2635.48	1670.23	812.094	1206.34	1092.57
		982.507	1004.58	885.36	2227.68	221.601	1027.81	352.289
		789.182	1920.62	1200.86	1745.62	216.666	1809.22	1394.23
		728.338	1257.07	1015.25	547.256	686.849	938.946	977.113
		233.432	1016.7	302.282	553.149	1050.85	711.263	876.296
		1318.78	995.532	360.553	1698.4	3027.28	1256.23	1259.28
		1822.02	1824.85	2585.74	1750.92	440.532	2265.87	518.487
		1307.44	1058.84	1434.93	1805.78	3402.46	526.588	909.308
		1605.77	2099.83	532.68	912.424	2097.23	1271.17	893.258
		1579.13	830.941	1259.27	2375.51	2398.6	1345.49	722.588
		1204.75	1943.27	698.486	3237.11	2794.64	1174.94	129.167
		1689.77	1339	2383.27	2354.9	1465.88	412.878	590.732
		1595.49	562.836	1598.37	1341.03	498.081	1522.77	634.736
		1055.43	1677.34	1969.96	1142.21	1015.34	1576.44	771.023
		713.802	111.936	2384.95	88.2311	216.343	2027.95	317.156
		605.451	2334.64	2248.92	643.163	2051.71	1992.02	540.833
		818.29	827.483	2595.63	2574.53	2882.17	731.55	1640.77
		1706.37	600.152	2473.51	1017.3	2298.91	2773.11	614.506
		523.252	240.921	3170.22	1546.17	1071.14	1531.08	755.54
		489.654	545.899	2470.48	1312.65	846.083	2783.86	294.688
		1637.58	1379.67	1858.8	989.049	724.712	1527.6	210.024
		1926.72	1341.23	1596.55	1196.46	288.668	2102.19	592.648
		1326.08	286.365	1153.72	915.237	650.216	1982.37	247.284
		2571.07	2382.17	1512.98	1854.79	2065.15	2166.93	478.655
		447.519	668.971	1205.03	1694.14	231.282	2444.31	1480.71
		1947.85	703.11	1251.07	1293.15	2006.11	1153.24	1706.54
		1864.41	485.747	2242.29	3437.34	945.362	743.251	415.659
		1751.87	992.312	1504.45	1446.22	657.863	539.252	1779.51
		1356.35	1306.65	1086.69	2289.57	2709.02	1273.2	891.45
		741.602	108.008	2045.88	1506.86	1093.09	1404.04	1260.89
		1366.64	1819.3	1824.62	439.728	1233.29	1631.14	2768.29
		994.963	2440.76	1249.3	2115.47	1969.81	652.426	1027.21
		1391.06	828.288	1773.19	1592.61	1933.32	385.217	559.313
		1844.15	1111.74	1346.79	3281.59	2316.06	306.436	1790
		411.902	1664.27	1168.09	1446.11	234.043	1348.48	356.383
		1350.16	827.899	796.495	1690.25	2130.73	1360.6	2035.22
		3002.59	1964.19	1280.03	604.927	2109.04	1537.06	1161.95
		2432.78	689.04	1757.68	2203.03	1655.96	534.069	189.06
		648.809	418.484	874.081	965.927	1736.4	1196.28	665.657
		1578.89	1716.89	958.35	1426.76	1330.29	1870.94	1523.75
		1428.97	654.643	768.792	1911.47	1373.27	1506.15	1015.64
		511.628	1111.93	1350.31	642.299	674.094	2027.92	1138.96
		2317.28	2761.8	970.476	1026.8	357.249	2391.78	689.434
		855.842	1184.94	1354.63	1404.49	863.966	1309.82	334.792
		3228.5	2060.76	877.564	2227.35	1757.53	893.746	274.229
		424.701	1079.1	1409.72	489.99	1472.1	232.504	1912.79
		1802.55	986.182	523.21	1022.37	2121.36	2149.69	1057.23
		374.156		281.152	1340.76	2190.84	409.818	381.428
		970.564		1297.79	882.843	1434.49	376.031	932.786
		1203.45		578.331	1269.5	668.453	306.553	1279.44
		1847.01		1232.55	1244.89	724.149	675.333	1894.44
		1474.67		2627.78	315.833	412.336	1884	1184.78
		1330.8		2195.39	179.573	564.137	1359.93	2323.87
		1448.61		1741	1118.82	1428.06	1583.45	1933.57
		2484.62		1252.59	916.892	2803.24	869.36	302.613
		1450.61		2632.3	3404.09	799.39	743.886	1096.78
		581.769		1855.44	3891.4	2122.04	909.865	1507.38
		1168.66		1378.88	2007.88	1407.73	1141.96	605.625
		1111.56		1453.77	3512.9	1852.7	525.231	1027.81
		1215.5		2021.92	890.822	785.885	544.276	523.477
		54.7843		1443.21	776.685	713.101	1159.3	438.243
		1411.92		1208.28	2618.74	814.484	347.173	1124.92
		1918.56		1832.34	918.29	617.287	2195.12	1394.05
		440.522		1241.65	2374.26	952.38	1436.63	634.125
		1348.22		1206.1	2146.57	893.477	898.48	867.153
		1875.98		1358.7	2478.23	2832.66	2154.05	472.907
		315.132		2268.29	1343.64	377.211	2172.45	212.097
		1847.56		892.036	1646.09	955.209	2699.39	213.845
		2336.39		1049.32	588.772	1992.84	1342.26	273.996
		1595.43		695.372	413.007	256.977	2496.59	254.739
		348.189		919.047	883.679	651.446	1461.63	183.039
		1599.21		1021.86	1402.54	2368.35	1847.27	1038.11
		1497.29		1591.22	887.905	2930.17	1469.03	447.74
		1412.57		768.809	681.657	2771.21	1505.22	964.049
		1707.39		778.941	594.992	3612.5	1706.78	350.974
		1595.65		1317.49	2223.36	1631.32	2302.8	628.853
		1026.22		878.701	402.991	2792.28	2335.29	462.011
		1300.25		863.934	1816.82	1074.55	264.159	1834.78
		1154.29		584.581	3134.35	1129.6	920.006	1542.19
		1406.82		788.548	1234.28	3366.47	2249.64	1003.85
		1750.69		436.512	1128.35	1708.19	1169.28	962.205
		1199.62		636.229	505.521	3020.85	1187.19	288.099
		1903.87		402.284	920.937	1907.79	1120.16	1575.87
		1026.28		813.131	1064.36	2764.04	1289.44	1930.81
		1869.42		1050.31	766.034	1705.35	736.951	1564.71
		1387.59		265.027	683.599	3217.29	2720.37	1618.92
		1031.41		962.54	715.213	988.015	985.498	1756.17
		1554.75		292.913	617.592	579.964	1780.77	1746.32
		561.033		1222.1	799.07	787.65	733.95	737.001
		2105.39		373.006	699.2	3043.73	888.716	1312.09
		979.423		690.461	956.762	855.152	657.487	529.649
		1725.98		887.341	1955.88	988.236	1574.94	3232.98
		1809.34		193.906	830.987	392.027	1364.21	1057.67
		621.298		2191.85	785.669	1331.85	1650.39	789.315
		1867.03		1479.35	309.446	2032.2	750.248	1489.62
		2835.83		911.344	1560.97	848.949	817.844	1253.88
		530.863		2559.6	983.615	688.252	3010.47	1008.99
		1525.12		2809.28	853.492	2791.01	1430.98	1912.98
		762.378		1655.52	753.275	1081.58	861.815	3935.37
		1184.72		1672.96	441.417	2216.95	834.353	552.388
		589.217		1411.2	772.474	2226.13	446.221	926.812
		617.432		1915.57	532.171	3161.94	1340.79	1242.11
		1525.59		2006.28	310.525	1171.61	120.256	1080.83
		1475.09		1415.12	585.921	1769.29	906.046	409.079
		1084.77		1412.59	1046.3	1440.16	800.296	395.376
		1677.47		1595.72	1193.16	1418.98	434.642	1050.59
		1736.16		1163.9	1084.91	1761.82	2225.99	922.516
		1391.47		1435.51	2020.89	1923.58	1310.4	608.128
		1916.89		1575.6	996.797	2464.54	1763.06	398.653
		1215.05		1569.19	1786.83	1513.16	1453.62	1183.4
		1547.48		1134.5	913.591	632.258	1986.3	3420.69
		1507.73		1355.28	1125.51	2368.55	1752.28	2797.47
		1668.24		1152.1	1649.73	1356.34	1729.18	1945.16
		1735.91		816.831	967.513	1993.41	1135.79	2414.61
		1852.09		875.52	1216.62	304.396	2139.07	1341.03
		1679.36		780.758	205.417	1645.6	3292.39	544.547
		474.107		843.726	1104.13	1531.84	1488.77	510.287
		1567.31		1309.85	2317.32	2764.96	1384.7	904.354
		1387.1		741.702	2372.53	970.629	837.731	464.39
		610.259		986.894	274.125	1859.77	1858.58	937.07
		828.223		592.973	274.888	3488.19	577.987	931.556
		1636.29		644.678	896.114	1053.92	3336.7	270.758
		2076.31		671.469	543.642	1012.66	2473.2	1968.14
		1009.99		413.186	487.423	929.443	1597.64	1955.49
		961.86		679.002	1355.01	958.424	1544.52	1849.85
		1484.71		538.172	311.527	3397.34	1439.25	792.779
		915.073		892.225	2224.82	1951.62	1107.33	1900.64
		1088.04		648.423	602.876	1628.89	2480.91	490.461
		1089.66		854.069	472.859	2431.68	1384.65	680.45
		461.854		77.2693	2205.69	2311.95	2188.4	351.171
		667.755		3670.04	1130.94	2682.53	1719.72	1381.57
		833.469		2966.5	1298.48	3348.32	928.892	843.205
		940.939		2537.34	1087.21	2268.73	1376.37	385.885
		1401.73		1804.81	185.601	2905.81	2448.65	1352.99
		420.669		251.361	100.237	3505.46	3837.08	62.9862
		815.013		509.092	443.274	3284.54	1787.62	300.085
		1362.2		1415.9	1686.33	1142.57	1336.64	54.3023
		1264.04		665.107	388.614	1718.77	1178.28	779.343
		1231.18			349.3	2396.8	1066.74	253.678
		1553.51			1804.28	2416.09	1490.86	679.746
		1360.16			955.841	1139.07	880.006	1921.06
		600.213			217.339	1535.68	578.016	906.422
		409.033			1783.22	692.507	446.516	304.225
		394.801			1247.11	701.221	764.605	955.874
		1025.94			1461.71	2025.74	844.144	419.497
		282.75			704.08	488.948	1638.62	1288.07
		1101.08			3231.37	1142.33	2617.34	1206.12
		734.86			2998.9	317.883	943.414	317.899
		1758.12			1254.66	446.219	534.355	611.524
		474.684			221.495	331.247	1052.07	1209.01
		1134.6			1112.63	1102.56	650.948	333.599
		592.379			1322.18	157.825	1454.19	1278.05
		1439.37			2136.29	1457.38	680.742	609.797
		1235.66			368.733	3115.2	532.293	1582.95
		1999.93			56.6949	3547.65	807.252	1926.1
		371.815			994.414	331.477	1063.79	1176.38
		329.487			2046.25	372.586	1286.57	1318.6
		113.788			887.784	757.53	1951.16	1262.78
		1306.57			2279.39	447.521	953.95	282.789
		1537.82			237.295	336.433	576.124	674.101
		1229.63			2585.59	2559.94	779.436	1088.85
		1835.16			2016.51	1176.72	1706.86	1193.18
		1647.92			1398.37	1216.94	1331.8	145.751
		1838.72			1056.13	1506.92	1198.14	1304.43
		1507.36			944.698	1103.35	1787.86	645.265
		1217.57			2151.5	797.167	1591.2	861.438
		1055.65			3352.25	484.133	2593.54	823.3
		1490.66				1028.4	1831.03	2233.21
		977.451				233.274	1953.13	635.229
		1157.98				1074.92	2426.44	2611.75
		1058.33				294.622	2399.82	650.112
		979.967				1196.65	229.749	720.318
		1309.67				1412.36	2322.36	701.078
		1198.13				821.382	902.654	3313.91
		1633.89				344.654	782.464	2980.27
		916.053				654.593	3312.29	1005.39
		1274.21				1033.61	736.236	994.732
		1413.52				782.669	1425.9	4861.14
		803.059				2613.4	1715.99	5469.79
		749.714				374.42	3349.57	2822.13
		1096.8				1302.71	2661.81	3293.18
		859.178				962.144	1977.36	1602.08
		239.874				1028.41	2238.4	3916.59
		848.045				293.883	1714.55	824.259
		1350.32				818.556	845.345	4665.84
		814.53				867.108	2605.3	2675.78
		299.364				2151.85	2204.91	543.431
		1378.03				2026.06	2078.29	4117.3
		1113.06				2869.38	1150.79	2440.21
		1256.3				675.519	295.378	2306.18
		174.108				1994.28	666.573	1273.05
		885.364				2696.1	1807.02	1281.1
		1057.58				1578.13	1293.77	1769.61
		905.261				2136.68	1489.7	846.795
		1647.21				1877.56	2415.37	2811.11
		1195.43				2084.05	1709.04	1581.02
		218.258				1914.06	2724.68	473.676
		376.937				1582.31	167.45	1321.68
		794.99				3210.18	1530.77	649.606
		912.827				2360.92	1772.54	2546.03
		1078.28				808.41	1305.49	2217.15
		2026.2				867.674	663.074	2795.31
		1314.99				1607.46	2250.76	878.546
		426.579				3235.99	1983.16	777.519
		1156.6				2878.77	1792.54	2262.3
		1339.43				1274.86	1693.79	439.835
		454.183				901.002	2181.8	412.414
		381.961				587.323	183.009	2139.09
		1277.74				483.744	2171.4	1043.74
		1614.69				2766.96	1849.02	1688.46
		1513.86				2848.69	2295.42	790.648
		1830.35				2190.37	584.909	345.637
		3021.33				1893.79	1763.81	1761.44
		1202.19				1469.88	2257.2	1135.39
						2661.23	2601.05	841.438
						2380.74	2297.98	3823.74
						693.822	3102.52	471.48
						938.991	714.764	1655.06
						2180.82	1315.04	3433.83
						1709.21	1790.01	2792.48
						2414.95	1931.08	3247.17
						1776.51	2092.59	4121.25
						1008.62	1306.4	3992.97
						570.594	3408.3	2539.62
						392.592	1486.04	3649.9
						776.907	1394.3	2031.71
						1017.85	2160.45	2438.61
						828.434	2335.16	3335.42
						239.168	2138.06	2484.38
						792.694	2467.67	759.938
						363.27	4095.82	5017.29
						3535.63	3068.47	2133.11
						2071.24	2763.3	2388.29
						1175.38		984.941
						715.549		1351.83
						1263.09		1299.64
						3440.9		1792.93
						1073.62		2021.45
						891.336		2248.93
						1213.46		3630.18
						427.456		1991.29
						792.421		1177.49
						2126.71		1998.93
						1347.57		881.314
						1440.83		1393.47
						3584.85		2073.77
						680.084		432.287
						1703.77		1704.88
						3069.84		2760.02
						1163.3		358.194
						4036.6		688.792
								2934.61
								2478.29
								2515.94
								2268.97
								111.843
								1802.5
								855.044
								2625.09
								83.0176
								2589.15
								1989.67
								62.3039
								1123.62
								1366.52
								451.504
								2235.47
								2408.37
								1565.51
								330.945
								255.291
								1561.83
								1444.91
								2522.03
								1677.03
								2919.76
								3403.23
								749.488
								2688.17
								1064.38
								1808.49
								1292.62
								2619.24
								2430.55
								1733.74
								1400.87
								2262.86
								1200.38
								2902.51
								2382.73
								2316.24
								2655.76
								2822.44
								2055.37
								2319.38
								724.669
								1071.44
								937.475
								661.258
								904.974
								920.788
								2722.92
								903.406
								1238.78
								2963.36
								2291.08
								2330.67
								2992.17
								910.042
								1297.62
								1128.12
								2308.9
								2973.85
								278.834
								2489.31
								1164.33
								748.85
								127.697
								1489.07
								2233.86
								1268.54
								1226.69
								2121.77
								860.042
								1252.21
								2291.19
								450.18
								746.464
								585.859
								1848.65
								208.982
								1178.14
								782.609
								840.544
								1833.31
								1787.21
								381.626
								1333.16
								999.28
								3079.15
								2861.8
								868.472
								261.713
								2936.5
								1113.63
								1728.37
								1202.66
								1234.33
								939.414
								85.3308
								753.879
								468.74
								3688.06
								2596.73
								2600.85
								2099.13
								3201.57
								1210.37
								1137.95
								1852.33
								1889.06
								3720.92
								3330.75
								3726.84
								2691.08
								2322.56
								1673.74
								1437.95
								867.821
								2070.94
								2470.21
								752.037
								870.4
								1963.15
								603.431
								2989.64
								552.201
								1732.88
								3165.82
								1684.52
								623.403
								1002.49
								2062.04
								2950.23
								2094.16
								3730.47
								1890.64
								910.158
								1172.74
								877.69
								526.147
								572.953
								1116.37
								1040.14
								654.467
								2010.81
								2491.6
								1046.75
								3017.83
								3323.74
								2525.2
								1906.48
								3788.4
								2025.12
								1680.99
								2660.83
