# Supplementary material for: Male meiotic spindle features that efficiently segregate paired and lagging chromosomes
Source: eLife. 2020 Mar 10;9:e50988. doi: 10.7554/eLife.50988 (PMC7101234; doi:10.7554/eLife.50988)
Supplement: Figure 8—source data 1. [file elife-50988-fig8-data1.xlsx]

## Sheet: Figure 8B
Autosome stretch	Metaphase no. 1	Metaphase no. 2	Metaphase no. 3	Anaphase onset	Anaphase no. 1	Anaphase no. 3	Anaphase no. 4	Anaphase no. 7
FWHM of chromosome stretch [nm]	565.635	573.88	610.338	689.719	634.797	661.548	515.901	529.319
	554.43	939.795	481.196	661.117	734.641	516.86	583.46	533.769
	459.96	647.949	695.25	620.838	651.429	464.336	536.978	498.796
	487.938	766.508	590.888	662.628	682.726	536.015	628.218	588.051
	519.676	896.739	717.244	671.749	726.77	650.099	519.54	604.709
	532.333	582.342	653.041	742.172	480.636	775.444	677.603	674.1
	516.211	828.343	521.113	556.491	621.416	789.229	526.936	556.926
	504.173	790.689	720.781	645.352	605.242	654.422	485.328	622.938
	557.57	642.762	607.864	690.426	697.075	732.732	519.346	554.587
	472.516	649.52	609.127	659.013	584.502	966.177	583.379	518.956

## Sheet: Figure 8D
Plus-End distance to centrioles	Metaphase no. 1	Metaphase no. 2	Metaphase no. 3	Anaphase onset	Anaphase no. 1	Anaphase no. 3	Anaphase no. 4	Anaphase no. 7
Distance [nm]	1349.33	1069.59	1314.45	1265.88	1035.48	958.082	882.775	760.856
	1052.63	1221.21	987.562	1313.27	1221.61	959.251	785.377	719.665
	987.764	841.38	937.152	1467.7	727.69	1015.62	512.302	830.087
	1049.53	857.875	1038.74	1155.17	992.741	553.024	767.386	944.162
	1118.49	1034.24	645.402	860.157	1235.56	917.029	748.535	340.58
	1053.19	810.055	1309.52	908.401	804.301	843.799	628.801	814.527
	1103.6	1066.56	1199.72	1075.17	697.237	526.605	904.634	1115.1
	1054.57	826.549	1191.71	1101.07	908.353	1451.31	824.312	863.443
	1333.31	912.467	1294.59	746.989	651.122	854.028	672.523	873.172
	1255.53	882.564	930.747	946.857	1101.31	971.361	669.04	858.617
	1171.17	874.33	1117.35	1035.88	948.675	949.186	675.955	796.455
	1189.56	904.61	1233.84	1090.22	869.994	931.895	788.487	626.902
	985.779	1394.04	763.906	966.298	860.796	1237.85	917.51	759.45
	1194.6	1427.85	656.368	894.124	889.808	988.057	1074.15	538.831
	1454.16	1246.83	721.064	661.509	979.418	1102.57	768.969	651.424
	1086.49	972.219	1354.65	967.397	789.48	928.697	593.732	616.468
	1030.51	1533.02	1618.93	613.534	853.896	681.485	763.009	372.893
	1139.95	1156.81	1168.93	685.385	1182.75	1223.18	1001.49	994.275
	1185.85	1755.82	948.407	599.82	829.624	1008.2	957.365	1062.48
	1617.69	1184.6	1542.51	958.081	858.585	1259.3	1127.67	962.584
	1379.34	917.694	1301.33	576.916	1445.18	881.754	1205.24	411.821
	1180.78	1136.84	1642.87	778.879	1126.91	929.558	461.949	1073.87
	1181.82	1176.15	1200.03	933.84	944.737	652.13	802.051	958.185
	1817.67	1080.23	1613.62	402.261	967.624	574.215	686.48	1268.69
	1289.48	1063.07	1119.73	1265.88	1590.61	979.469	719.859	494.022
	1414.3	832.137	1569.27	1313.27	1537.55	1601.96	591.088	715.383
	1097.45	1118.7	1241.37	1467.7	1476.26	948.924	693.138	916.374
	989.117	883.366	1053.55	1155.17	1275.19	1000.17	572.229	1058.73
	1543.5	990.635	1357.1	860.157	1535.22	1030.18	483.667	948.301
	1433.82	843.994	1195.29	908.401	1293.06	1129.34	650.271	1060.73
	1275.47	784.475	1063.29	1075.17	1032.99	900.065	670.032	1553.69
	1319.64	1050.88	990.431	1101.07	1179.79	1257.31	475.001	1332.57
	1171.24	1364.34	1103.85	746.989	1029.45	990.806	923.86	989.291
	1146.21	1327.27	1097.84	946.857	1136.85	889.586	605.857	1011.54
	1171.34	1607.82	1501.33	1035.88	1026.34	1036.86	607.167	1123.58
	1218.56	691.722	1268.78	1090.22	1078.83	612.917	497.419	1000.42
	1327.83	891.665	1347.83	966.298	1105.23	722.165	798.731	1496.15
	946.604	415.332	1247.89	894.124	1083.01	1379.06	809.006	720.46
	885.035	698.873	1520.97	661.509	911.455	878.579	705.604	1351.95
	1083.46	642.188	1288.97	967.397	930.583	679.319	876.334	576.362
	1449.78	634.64	1548.37	613.534	1068.58	813.86	1059.4	1204.83
	917.881	1007.25	1004.52	685.385	734.412	1215.55	497.085	542.835
	1090.85	1387.97	1021.27	599.82	1084.2	805.718	538.233	1120.87
	1123.39	710.811	1221.77	958.081	795.889	1313.88	705.742	1369.83
	1157.68	982.22	1257.53	576.916	1358.43	454.76	397.564	1657.3
	1070.11	1007.84	1479.49	933.84	969.948	704.819	441.112	948.214
	1155.55	1053.84	1310.7	402.261	1156.81	594.394	731.719	1136.19
	1043.01	776.349	1569.38	1651.59	798.105	608.824	1241.29	617.61
	870.916	1546.22	1848.3	1729.58	1173.68	428.098	771.194	532.188
	1110.36	594.25	1671.23	1512	1195.97	538.741	897.136	525.885
	1287.34	947.868	1425.57	1681.4	1294.44	596.506	495.475	567.235
	954.878	753.12	955.385	1167.65	1061.77	685.985	765.501	688.188
	839.457	666.285	978.236	1480.63	834.375	1039.19	602.933	619.815
	1299.87	694.932	1695.02	1902.65	1611.01	535.704	797.739	799.394
	929.845	1210.17	933.851	1681.09	1334.92	534.931	943.769	448.892
	1005.44	862.675	1164.07	1678.84	923.209	436.727	890.062	585.481
	1237.93	604.869	828.644	1684.2	1382.65	744.99	817.357	986.095
	978.013	801.719	899.047	1467.4	817.83	571.283	754.759	625.458
	1066.67	605.698	924	1213.08	948.778	701.41	800.768	908.664
	808.237	1422.04	899.824	1073.91	808.215	529.501	526.639	881.581
	989.958	1151.22	1112.74	1158.07	895.701	1047.14	958.26	1027.08
	914.86	820.642	838.535	972.607	479.015	943.953	891.614	1535.47
	998.599	1005.14	1151.53	1400.55	528.285	1294.36	482.974	1112.36
	1319.98	981.431	1014.83	1507.94	1262.52	1072.86	750.977	1491.54
	1083.22	788.292	1021.67	1306.56	785.774	1089.62	721.403	1131
	1136.5	791.555	799.886	1015.05	1047.35	1063.44	453.481	1185.88
	1193.8	917.494	1643.07	1230.54	899.287	959.295	461.094	1040.23
	1025.69	899.345	993.517	1177.55	1348.98	570.964	563.378	948.074
	1131.33	790.923	708.799	972.265	773.358	864.406	745.593	1155.47
	1126.41	1379.71	883.965	1394.67	581.656	402.701	892.908	1156.27
	1328.53	1337.77	998.846	1209.72	791.906	380.059	882.054	841.788
	1035.7	1029.87	724.632	967.094	946.996	566.451	833.443	1114.36
	1070.98	1228.57	1085.63	1082.73	749.879	403.435	1009.25	1147.91
	1051.86	602.53	1166.27	1005.59	879.165	805.069	941.319	1054.99
	1192.24	1026.45	691.039	1029.01	1030.86	579.332	685.418	884.252
	1118.97	1259.4	936.349	1211.76	514.286	961.673	863.492	892.312
	1042.26	1069.07	717.123	823.398	683.684	992.078	797.525	1217.83
	1099.53	990.609	596.163	975.608	680.534	406.36	506.037	977.623
	1240.68	1038.39	995.461	757.707	722.468	489.464	625.946	946.26
	1317.13	1193.03	957.286	816.847	747.021	768.459	670.539	959.79
	1061.57	901.547	667.306	1488.99	688.536	434.653	574.043	1042.13
	927.02	1123.91	966.862	1375.85	1271.39	509.973	367.976	1352.37
	991.967	1702.08	1047.35	882.928	1400.83	550.64	1059.99	1438.04
	985.233	1545.78	1149.37	1090.8	1137.7	589.479	776.523	973.339
	881.297	861.746	1134.63	1009.97	685.187	999.685	762.862	592.606
	1036.57	891.964	920.594	1091.66	812.203	1023.86	792.542	952.222
	690.62	1034.41	1313.91	822.479	562.75	1115.98	1122.7	682.662
	944.559	858.168	789.844	1021.94	591.24	1345.49	798.382	633.51
	1017.26	1497.29	957.965	1066.61	540.102	747.935	748.154	992.488
	1034.13	1139.45	1468.79	971.734	490.385	1063.67	414.046	396.028
	839.518	1064.87	700.7	993.775	322.294	1073.21	784.919	473.251
	819.446	977.627	912.136	948.932	914.506	1102.13	711.299	481.688
	2721.08	757.578	972.455	727.742	301.468	880.54	802.277	656.445
	849.811	875.616	663.594	1155.72	372.809	946.972	471.001	858.468
	816.23	878.064	700.587	1151.41	533.736	619.913	453.835	517.808
	1276.35	900.297	719.192	906.194	545.902	494.544	1264.13	886.88
	1009.44	885.293	911.415	816.62	1070.58	714.555	1091.01	983.286
	1155.23	1338.32	594.885	784.818		914.131	550.831	1093.14
	1229.99	1114.13	977.505	923.351		678.527	549.516	1116.8
	1192.58	1077.65	813.928	939.914		458.521	918.724	1082.85
	944.868	800.343	1286.28	1156.6		664.142	905.794	1090.22
	844.397	1099.62	1220.34	877.952		1200.18	763.148	1054.47
	912.008	1322.42	608.49	923.168		1137.41	474.595	1241.77
	1080.54	902.086	1257.23	1024.01		1203.03	568.903	1070.42
	1087.47	919.789	1032.57	998.653		1187.25	688.07	1045.96
	986.2	785.126	850.369	906.086		1096.96	791.225	438.795
	903.548	1007.85	900.068	905.131		1000.32	663.869	1106.49
	896.627	916.258	784.971	1777.84		1130.27	666.163	609.834
	1084.1	1411.19	980.468	1765.28		1275.45	464.996	433.45
	979.972	871.08	795.502	1697.9		860.686	848.949	1282.79
	970.127	1701.56	1168.89	1506.13		1185.44	637.856	623.713
	1111.85	808.36	1199.71	1178.78		548.609	539.26	1019.29
	998.184	990.281	928.958	1321.66		1128.84	588.062	1194.59
	881.571	874.013	762.166	1427.45		1368.15	885.939	629.141
	835.932	817.541	904.723	1248.6		567.722	875.66	512.387
	1189.87	855.665	1081.84	1250.64		1278.81	910.462	445.981
	1141.95	954.072	896.85	1315.37		1285.98	1307.46	628.107
	896.154	741.651	1517.48	1228.82		1125.49	1188.02	650.175
	1291.39	1015.78	779.435	1044.99		1033.37	1252.29	860.498
	1357.75	1046.73	977.677	897.889		807.593	927.141	598.062
	1055.61	1611.52	1413.96	1258.89		1377.05	1005.13	793.715
	1161.4	803.242	1231.52	763.195		1420.12	1068.5	717.607
	1367.56	1501.75	1163.08	994.483		748.798	603.063	1163.44
	1131.69	726.832	1144.38	1010.5		939.835	571.113	708.337
	1195.68	980.113	991.146	1045.04		1044.97	609.59	1228.6
	1561.64	774.254	1129.87	1014.09		886.396	926.536	1323.9
	1523.21	1049.89	1069.07	996.979		1087.91	564.345	1106.88
	1039.44	1219.82	1022.93	901.926		753.215	638.948	1329.36
	1293.76	1011.78	1471.24	718.59		1473.43	896.756	886.272
	1205.76	978.531	1499.64	849.077		808.665	1082.9	1017.05
	963.35	917.685	898.611	703.576		633.935	645.972
	1481.84	900.59	795.157	828.746		758.913	763.347
	1327.15	1323.72	1062.15	801.605		671.362	647.2
	1637.04	1309.78	1552.73	843.661		1113.52	715.601
	1062.34	788.208	890.304	1581.65		857.423	671.283
	1248.67	651.941	970.687	1158.44		864.677	1116.37
	1643.8	980.763	1042.63	1058.89		838.281	753.678
	1264.06	802.575	1088.49	1168.12		841.789	1243.58
	938.758	1087.29	1386.57	1141.87		615.072	1250.54
	1192.85	799.471	1192.22	1021.01		541.331	978.013
	935.061	1042.82	1028.95	1200.39		811.53	617.811
	1105.07	1329.16	804.854	934.431		1208.47	639.588
	929.653	1181.57	839.517	964.568		1045.09	860.367
	941.655	924.442	824.691	859.348		978.001	881.973
	1066.97	793.013	826.24	828.219		1135.57	1275.76
	1571.27	874.031	889.193	982.277		943.625	911.237
	955.863	709.769	1315.45	771.215		691.175	1077.45
	1438.59	1584.07	1311.93	839.102		778.744	794.345
	1077.22	1020	1065.86	903.755		1114.13	525.978
	861.995	962.735	751.956	1025.23		1232.09	599.918
	973.578	849.444	990.284	934.908		1023.75	782.233
	1430.1	712.811	829.143	876.872		929.15	538.979
		723.98	959.564	799.551		1063.18	672.497
		1124.05	618.815	859.885		1270.59	1047.49
		969.615	952.731	874.192		646.892	1230.08
		1225.15	694.94	746.489		1229.24	1204.63
		1267.7	660.369	999.301		899.884	897.17
		656.465	1642.53	800.901		1143.13	1233.48
		866.124	771.32	987.269		819.568	795.937
		1045.65	1076.04	722.612		884.376	1050.86
		1093.08	627.882	781.119		1112.6	665.517
		725.557	1571.43	937.94		710.785
		1090.16	729.564	884.446		548.321
		1037.57	856.978	739.478		922.441
		1286.41	1110.85	697.183		699.359
		1122.96	1047.83	1165.92		748.596
		1005.65	793.584	991.779		681.725
		1198.28	918.788	1657.54		721.301
		831.88	760.38	2069.88		531.32
		799.471	963.219	961.56		563.444
		1042.82	886.107	1248.78		709.012
		1329.16	1822.56	980.877
		1181.57	956.812	1390.52
		924.442	993.706	1472.86
		793.013	864.4	956.33
		874.031	890.655	1162.38
		709.769	1097.87	974.996
		1584.07	966.187	1110.71
		1020	1101.97	1100.13
		962.735	1430.42	1592.07
		849.444	822.034	1396.45
		712.811	1026.16	1144.23
		723.98	854.404	799.097
		1124.05	870.587	1099.22
		969.615	1097.59	1527.48
		1225.15	1178.41	1264.05
		1267.7	1154.44	1606.22
		656.465	1101.78	1470.19
		866.124	1271.14	1678.84
		1045.65	995.563	1214.46
		1093.08	957.836	1155.26
		725.557	842.719	877.602
		1090.16	978.543	995.929
		1037.57	1205.16	1159.06
		1286.41	802.069	1087.98
		1122.96	1450.89	880.858
		1005.65	712.374	860.676
		1198.28	852.69	1215.88
		831.88	1137.13	855.383
		1447.35	1156.89	877.732
		1196.87	1112.68	830.119
		1481.46	1107.1	1303.7
		1440.94	544.577	1145.28
		1156.41	1323.55	1611.03
		1113.1		1566.54
		1700.67		1538.9
		1085.12		1369.38
		1058.43		1483.29
		880.872		2032.48
		998.685		1002.39
		985.324		1415.8
		1169.4		1013.36
		1066.77		1634.97
		822.308		1430.46
		737.803		944.538
		1190.3		816.534
		977.387		1051.99
		754.782		1763.8
		956.742		912.773
		890.961		822.005
		760.323		1042.24
		812.186		1351.34
		1243.41		1009.45
		1061.43		864.279
		858.447		985.734
		899.593		706.673
		736.04		1804.91
		673.128		1221
		804.372		1630.92
		738.075		855.617
		655.79		709.451
		749.118		1119.68
		919.838		993.105
		783.938		812.033
		947.667		918.913
		622.158		1054.01
		661.445		775.988
		807.192		948.273
		855.087		937.451
		906.495		678.835
		900.911		804.427
		899.77		1429.18
		1151.09		1564.54
		2028.73		1037.89
		1138.32		1429.71
		2071.95		1042.18
		975.905		1723.76
		554.184		755.075
		709.657		1157.35
		961.812		950.915
		653.166		1575.5
		764.654		1189.85
		707.976		1170.95
		598.314		933.79
		684.484		911.532
		704.061		1570.85
		535.472		1492.65
		853.936		1209.26
		1404.3		1037.92
		713.357		1123.5
		619.886		746.896
		617.155		1335.81
		681.802		1207.77
		1012.77		973.869
		1317.87		1157.6
		1472.58		1125.37
		579.077		1167.33
		1332.21		904.174
		1178.9		1310.2
		728.148		980.581
		1045.84		883.05
		840.387		931.799
		865.662		984.102
		996.079		1132.75
		897.872		1177.75
		825.397		1250.1
		903.507		1157.35
		768.433		950.915
		1602.86		1575.5
		1463.3		1189.85
		1323.46		933.79
		1245.21		911.532
		967.16		1570.85
		1013.37		1492.65
		1331		1209.26
		929.405		1037.92
		863.634		1123.5
		1842.07		746.896
		1703.62		1335.81
		950.903		1207.77
		866.527		973.869
		742.335		1157.6
		991.251		1125.37
		930.037		1167.33
		1177.85		904.174
		657.669		1310.2
		836.072		980.581
		1080.71		883.05
		1146.96		931.799
		721.305		984.102
		898.923		1132.75
		1035.6		1177.75
		843.693		1250.1
		599.684		1386.07
		795.396		1280.08
		745.661		1334.89
		962.363		1000.61
		862.26		1778.62
		706.37		1188.47
		880.889		692.492
		940.082		713.186
		648.314		826.184
		650.436		1066.25
		903.581		1266.6
		1061.24		1456.64
		1060.08		895.949
		1051.53		1011.58
		1013.33		1142.53
		1149.04		831.196
		931.707		872.961
		1191.02		1079.16
		979.193		913.459
		828.376		923.902
		815.556		1098.64
		902.806		919.405
		857.896		730.839
		873.791		762.069
		946.224		1261.46
		1044.72		844.131
		939.516		771.259
		965.258		809.07
		1625.41		1300.37
		726.336		719.135
		969.418		819.932
		932.059		1026.73
		959.002		920.348
		1071.65		1640.18
		1008.96		1244.58
		1295.84		1230.84
		912.611		899.809
		857.044		972.579
		940.2		859.786
		1041.04		1264.08
		1021.57		1147.06
		880.658		904.004
		1171.81		1195.09
		1674.89		951.553
		1051.14		1365.4
		879.738		860.201
		1365.6		1174.92
		1423.22		1667.67
		694.91		1169.23
		844.65		975.064
		1570.87		1083.53
		1198.25		1562.42
		1525.28		1191.57
		527.043		1644.91
		854.652		1359.71
		814.05		952.212
		747.854		1232.46
		802.794		981.533
		1462.45		999.54
		733.733		1117.57
		1594.39		978.975
		723.953		1025.65
		1122.76		1077.98
		878.219
		765.157
		917.402
		833.171
		891.913
		623.053
		1267.3
		812.129
		912.026
		1117.3
		710.582
		763.38
		783.612

## Sheet: Figure 8F
Plus-end angle on autosomes	Metaphase no. 1	Metaphase no. 2	Metaphase no. 3	Anaphase onset	Anaphase no. 1	Anaphase no. 3	Anaphase no. 4	Anaphase no. 7
Angle in [°]	44.2428	34.2214	122.562	2.55411	42.2993	54.3559	63.0362	92.4956
	13.4291	78.5223	71.9141	86.7965	74.9728	98.6265	56.355	36.2582
	17.0328	49.6318	75.4516	97.0922	89.0537	22.7266	26.5828	121.628
	27.3749	4.79235	31.3566	101.052	36.3662	17.8343	32.7809	102.623
	30.6838	7.76152	29.6607	70.8019	62.7718	33.786	34.3997	111.392
	20.1189	28.6267	31.3922	24.8885	104.131	39.9694	40.0592	71.278
	16.4971	14.2818	11.3339	46.5387	22.6924	10.5869	68.2258	54.8156
	16.74	35.977	70.8931	39.9326	30.8669	31.0325	44.2494	34.5374
	32.3251	30.9501	53.2445	39.6908	33.6831	31.8348	39.7417	14.3842
	47.0571	12.2854	51.6156	21.9414	51.5465	72.5015	29.095	67.2724
	45.6339	14.9639	65.0692	49.3162	18.3961	29.8084	32.2562	53.7748
	26.577	11.7595	23.1328	28.4355	71.8193	36.713	39.0852	9.41998
	18.91	10.2141	30.9606	64.8929	43.9161	46.954	78.0638	12.5148
	1.41924	32.2774	57.5754	45.4198	38.32	11.3911	84.2188	32.465
	22.4195	78.8419	10.5639	40.478	26.9509	91.038	34.4594	29.6147
	62.121	81.459	8.58302	17.4115	18.1987	24.393	31.305	59.2507
	11.7823	51.2239	4.07396	44.4197	33.0041	63.5032	33.5962	66.0256
	8.81796	27.895	83.1517	4.42254	2.42851	28.1014	93.8403	33.9763
	16.6854	93.7478	108.38	3.02809	13.1947	60.7022	82.2774	10.6378
	27.3928	46.7545	45.1739	26.4997	46.9201	59.4022	107.76	73.0203
	69.1129	111.169	29.2067	24.8226	10.6803	23.8122	28.2273	84.5716
	18.5596	44.2662	67.9751	26.4922	2.43415	132.106	29.9008	96.6394
	18.6044	28.5102	31.5105	15.8165	87.3133	71.5823	65.6514	130.689
	17.5532	46.4662	80.2667	46.1999	29.6858	11.6957	53.7228	77.8648
	101.237	42.3407	24.7637	39.6662	19.5871	20.6308	46.0917	114.238
	27.0649	29.8638	79.5376	10.7047	22.1047	11.1869	38.6702	120.295
	36.6581	26.491	20.247	26.5529	106.247	8.54373	47.664	61.3019
	14.0118	19.3297	64.8724	97.5955	95.7635	65.9767	23.5705	24.3728
	5.92511	31.2209	21.6564	102.245	82.4202	81.6404	18.9828	88.3022
	19.9358	9.85151	12.5307	81.869	58.5269	42.795	21.1089	37.8357
	40.6815	28.9132	38.9573	99.9986	95.0049	31.7046	52.3403	58.9656
	26.3004	9.60226	16.901	37.0288	13.7693	95.6749	39.835	63.9784
	37.1431	4.32774	18.3295	76.7283	67.5049	87.529	32.3223	44.0768
	14.1846	23.938	9.14744	121.044	27.6929	47.5595	88.0831	50.859
	21.9963	68.8839	19.7612	108.213	57.2523	66.2433	45.4084	21.1397
	39.3697	77.3211	15.0842	110.948	39.0087	39.181	47.6583	2.67228
	38.1855	134.068	65.347	105.23	37.7255	58.1141	38.8908	38.5951
	58.8401	7.53743	21.8256	71.0158	29.888	65.249	48.695	101.01
	15.8664	32.372	17.5559	42.3297	40.9421	90.7263	48.5322	106.688
	0.227047	13.1857	18.487	8.32655	47.2896	48.6867	37.2506	20.7294
	14.1993	14.1512	66.7041	35.1864	43.8246	68.7413	34.3582	53.3075
	80.9133	19.6008	41.4303	21.6523	38.3179	73.1787	13.1695	24.7957
	13.0354	13.0735	72.2983	49.2123	31.1015	73.894	29.4845	24.0761
	32.9249	50.9143	9.73833	76.7619	52.1216	58.8134	28.6997	25.6758
	31.5303	98.4989	10.4587	59.6599	4.92641	57.484	8.46769	27.7389
	37.3839	55.1291	25.0184	14.1456	51.2145	129.573	22.1753	47.3555
	41.4531	23.7517	28.483	41.1234	7.48005	81.946	45.9149	74.858
	58.0236	45.0027	62.5973	34.6625	79.8133	51.4099	10.1338	3.31691
	32.9253	44.0258	36.9078	16.4479	24.5403	11.6484	7.85109	76.1245
	26.1749	56.4127	76.8095	70.0747	45.6384	36.0288	55.6857	19.1193
	54.9212	22.5928	105.262	44.8936	14.6987	62.3573	65.8334	42.8475
	65.8485	126.867	90.9441	22.8259	57.272	58.1055	68.4584	21.5382
	24.1828	8.5849	92.5837	25.1446	62.3378	24.1075	93.2244	16.4878
	5.1853	25.4526	32.7299	22.109	73.1858	44.6381	28.9239	115.14
	78.7655	13.5838	6.75728	19.0438	47.443	25.0439	71.6873	58.5395
	8.94563	4.29473	124.342	29.4359	28.3549	39.0703	50.9775	8.31107
	31.3382	23.6562	28.1908	11.3398	82.5693	124.469	75.7243	13.5134
	50.9436	60.729	57.2185	3.4938	27.6981	20.2353	47.3416	33.3934
	38.9526	37.6522	15.5704	10.4794	29.1457	20.0995	80.9669	31.0632
	50.411	8.3337	13.5301	21.5066	106.859	16.8668	98.2125	106.007
	10.1732	34.6344	28.5994	70.8987	5.55246	15.4441	47.1771	109.758
	37.2358	15.9969	29.4213	84.2607	33.2907	5.40018	21.1879	62.6898
	23.7625	96.9451	37.6534	23.5488	64.509	48.1604	37.2685	41.7835
	37.3647	48.4556	21.4002	50.9234	44.8076	25.0974	57.9006	63.9125
	75.1069	24.8339	52.8934	37.3537	40.3476	49.4523	84.3137	91.0735
	26.714	112.422	21.3821	48.4462	56.407	46.8071	18.0645	32.53
	44.9382	39.5302	24.3147	9.44546	6.28273	21.8675	101.981	2.85345
	58.9379	33.481	22.3193	37.502	7.91328	22.8138	75.8408	104.343
	29.7663	26.35	115.657	43.4711	80.9467	120.909	25.0789	31.9797
	13.9804	14.6661	46.5716	22.7132	20.2554	100.576	57.9903	93.8941
	23.3619	38.7595	27.1003	37.537	93.5164	42.2219	52.9808	155.802
	59.2096	23.44	34.2658	29.7111	43.5697	108.752	2.54186	123.245
	11.3416	18.9818	45.0549	14.6139	77.5385	14.734	5.24824	72.3063
	41.4267	88.6774	21.8586	60.7578	72.8701	117.492	47.5216	33.3882
	33.3352	89.61	58.5887	60.6184	34.1146	156.546	22.1981	35.0643
	44.0727	46.4568	76.8318	13.1701	19.3936	25.4463	57.2973	28.0769
	41.1291	78.3615	22.9532	11.7247	20.9534	24.0548	106.6	42.7926
	37.7733	21.5754	21.5316	15.8544	63.8056	29.5159	67.8524	34.1889
	24.6375	20.1032	10.2573	27.4954	48.8346	19.0681	99.5849	41.7192
	55.4441	39.4491	14.6191	28.2841	9.58032	28.8447	100.681	29.138
	97.7347	30.2369	49.1034	58.5138	63.0589	29.8586	109.395	20.8542
	47.5414	27.1399	47.8836	21.7096	83.337	25.9796	87.2022	57.8315
	35.4775	28.2278	15.1705	36.3201	39.4934	43.4671	112.334	24.2259
	53.334	32.4385	40.634	41.685	45.1584	11.5426	80.247	34.0867
	43.6632	5.59965	58.9465	35.2513	48.1773	105.504	96.287	38.5591
	29.0153	30.2494	73.1391	32.2176	46.0532	93.5081	74.7403	53.2296
	56.9233	119.786	70.4901	37.1994	84.589	36.4807	99.779	41.3246
	6.79583	92.2201	27.5024	95.5984	48.5702	16.9666	79.5542	32.0258
	35.0118	5.84857	68.4754	78.1708	78.0717	70.0728	95.8788	24.5621
	57.8662	3.93556	8.94765	95.2328	28.4262	18.9549	101.556	20.1139
	52.0394	24.8521	27.8946	47.6641	115.636	48.6589	85.0684	13.1906
	35.2394	9.50679	92.9007	17.9555	122.34	49.5417	69.6968	32.8862
	26.7869	74.0639	12.551	35.3353	51.1522	26.6264	108.578	20.8003
	54.4398	37.7234	35.6109	68.7064	31.5598	83.4134	110.485	38.212
	25.0498	20.3691	31.6442	45.1868	52.4893	169.704	101.404	26.999
	25.3766	23.1884	37.2236	48.3357	24.8304	78.9001	105.866	26.866
	63.2058	6.02539	5.86336	59.0692	25.4567	25.2123	115.623	110.308
	33.2677	15.2116	5.90071	54.3357	23.4942	42.4935	108.927	83.6469
	61.5797	9.38804	12.4579	43.9087	6.84387	40.8137	101.719	95.7446
	70.2234	17.3641	120.73	4.0205	15.2977	21.3689	26.5575	48.9119
	46.149	8.32312	32.8727	40.398	81.4269	77.9394	50.8049	29.7399
	18.5961	49.1991	17.0759	23.2918	13.0685	75.0944	29.2168	31.3393
	8.42605	23.0734	45.6951	25.3416	5.74809	86.0104	37.7936	13.3017
	19.9035	34.846	27.9118	23.8348	30.2838	47.0704	59.8036	80.2644
	42.7425	13.3467	78.4079	40.7662	29.8619	40.893	10.5172	80.91
	48.586	26.1893	72.9883	37.957	96.2471	32.858	2.22369	9.62577
	31.7723	57.5391	20.3229	26.0212		20.6858	72.8081	62.5723
	17.537	20.7669	79.8177	31.8922		37.8763	131.447	73.1122
	23.4241	24.8745	46.791	24.6009		14.9584	25.596	25.9631
	29.3865	18.6215	27.8152	13.2017		53.7736	16.7757	3.09826
	28.2001	30.6036	25.8352	17.1821		25.0354	101.854	30.1124
	34.6633	13.6265	24.0178	13.6571		2.45113	88.3034	56.1363
	63.4513	63.5402	43.4837	27.8679		18.1935	47.3356	21.7723
	34.2984	24.3833	27.5068	29.0926		33.5641	34.5211	18.3676
	32.3985	128.682	54.822	30.2152		53.6094	48.0874	15.2394
	26.1561	9.28494	63.0833	108.639		85.0568	72.7394	56.091
	52.1	25.8252	31.6404	58.4845		84.1521	85.2392	23.0931
	67.2402	14.4165	12.502	60.355		80.3534	47.573	47.6981
	21.2998	5.03065	40.2391	63.1391		62.9123	78.9646	40.7278
	87.4091	14.9889	57.7173	61.5047		51.0591	19.3524	59.1086
	84.08	20.4935	22.391	39.402		53.6225	71.9724	64.8698
	51.2907	10.1148	115.859	69.3853		94.4043	50.7478	48.1443
	16.7024	23.1466	20.728	34.2245		30.2674	14.2558	54.7423
	38.5439	35.8616	40.2007	40.7902		69.6074	61.2021	8.38311
	20.3818	115.842	86.5543	29.501		9.2672	23.8985	67.6176
	11.3826	14.9077	67.36	14.9867		62.2447	111.326	65.6134
	71.6515	100.886	49.2687	32.16		108.607	104.327	38.8342
	35.5472	14.8662	55.8722	14.4456		9.70007	126.404	46.6821
	26.8532	31.713	36.5588	39.2293		67.8231	176.993	38.9038
	28.3242	10.9394	28.4106	45.4394		68.8901	52.374	56.0662
	13.973	41.8229	45.4085	55.1492		43.3848	121.781	43.9091
	13.7103	61.1208	38.1486	40.4603		28.2432	107.116	41.9558
	57.2065	34.5384	95.1864	34.9156		24.8486	71.3151	47.1519
	41.6253	20.4061	97.1317	29.2792		127.063	116.338	60.7284
	81.5931	31.9477	12.882	16.9525		155.374	96.9323	25.6436
	17.4182	29.0416	26.8006	33.8215		27.4406	78.9388	39.0586
	33.3628	81.3974	23.4647	24.9926		35.2933	96.1359	6.51155
	81.2013	79.0521	99.9591	55.2863		24.7515	80.0917	75.6272
	18.948	25.2171	17.939	31.8759		35.7101	7.21017	27.6259
	34.936	17.2285	31.1366	47.5448		52.0774	9.68154	55.9727
	61.717	33.9551	39.7847	15.6952		11.2884	24.2006	80.8537
	27.6559	11.9134	20.1625	23.8003		110.268	14.1153	83.546
	40.2808	47.9314	81.4226	48.5315		29.652	51.5748	72.216
	4.03943	1.27954	46.4807	44.749		8.38093	20.9748	26.1151
	31.2272	46.7286	25.2348	22.6586		25.3812	22.269	64.2673
	31.233	83.1424	0.961909	25.6022		2.96451	62.2393	62.6027
	116.111	62.7312	9.46934	29.0441		66.474	101.616	81.3524
	34.8269	28.4635	8.59173	26.7499		33.6865	12.9179	46.5539
	72.0613	9.84496	4.54887	103.244		35.0271	39.2581	68.6611
	33.0281	5.95594	26.6389	136.06		32.5072	20.5889	64.2309
	18.0489	10.1269	73.3653	27.175		38.6393	23.3278	96.2319
	29.6973	128.068	100.787	47.0698		25.8886	44.6731	58.4011
	100.027	43.053	50.0703	22.3049		29.9712	72.8541	60.3655
		36.0729	28.1257	75.7496		22.8787	8.72886	83.8672
		13.4918	36.3216	74.4347		45.1405	124.894	70.1716
		7.67739	19.5041	14.0971		99.6969	95.6224	31.6122
		17.3967	29.2303	40.4988		92.833	66.6744	72.2792
		51.7696	21.1428	17.8211		74.1641	65.7823	89.2026
		38.1688	31.4879	33.7425		86.2391	27.7992	55.5706
		66.7064	15.0541	39.7877		55.7151	45.5602	72.8477
		78.4734	12.6994	96.3008		28.3139	49.3168	97.1656
		9.22081	140.648	67.145		26.4981	56.4483	23.7509
		27.613	7.16581	38.0368		84.6986	11.0598	60.5718
		31.5959	60.2796	12.74		98.8219	98.7516	38.5315
		50.5795	33.357	36.5367		75.5718	92.6089	31.5653
		4.67726	132.825	71.2496		55.4431	81.3771	64.211
		47.1863	32.5904	53.0846		52.1896	76.3597	53.4095
		38.1686	39.3915	97.8179		82.2812	49.0864	25.5641
		81.9737	65.8882	75.8523		104.17	48.3243	64.5719
		54.7456	67.2592	101.401		14.2977	82.2101	62.1801
		41.877	22.91	45.1564		84.0913	2.22433	14.3645
		63.8754	39.1754	43.1095		114.572	63.558	43.0084
		32.2024	31.3892	16.9586		55.4849	35.7152	39.3283
		115.692	13.4614	13.1947		84.2195	83.2055	16.5076
		68.8172	13.8845	41.5045		44.8423	112.536	52.6839
		106.614	116.023	24.5409		50.2169	14.2623
		104.717	3.94258	5.08424		76.4454	80.4398
		63.2876	19.9621	11.5973		33.3775	17.5143
		56.811	4.13647	51.7197		24.342	47.4766
		129.309	11.1679	1.95018		54.0203	108.989
		58.6646	28.5679	3.2038		31.769	42.8719
		48.4431	15.2884	13.5504		40.8281
		28.3523	24.4371	59.2634		11.2366
		41.2294	71.7641	38.364		35.0025
		34.7095	6.60787	92.3396		18.7999
		26.1732	29.3565	82.4024		22.7323
		68.9054	12.3599	77.0186		27.012
		57.6678	12.9323	47.7436		19.8523
		18.8105	20.3802	70.8605		37.6026
		10.8251	36.893	123.912
		57.7214	47.0124	17.9826
		38.9259	11.6019	73.6772
		18.3836	30.7331	18.623
		3.02126	22.8061	88.7758
		35.5081	30.1511	77.5464
		17.8111	8.31026	13.0913
		6.3735	19.4695	12.1583
		79.1921	45.7894	27.8047
		52.185	10.2385	96.068
		5.69914	78.7001	24.7368
		30.1	9.28729	8.0803
		22.5147	12.081	37.0677
		10.5514	30.4652	67.4198
		26.6197	10.318	27.7142
		30.3714	27.1954	12.8248
		4.86224	21.5028	26.6163
		20.1612	9.28687	3.78851
		32.3492	55.6285	115.404
		21.1611		49.8898
		32.0444		102.287
		8.63512		16.036
		8.66107		5.81368
		25.0855		43.5539
		23.2077		36.8661
		24.9682		24.1612
		28.3956		26.6958
		26.9186		41.3472
		56.7167		16.2235
		153.494		20.2115
		49.2757		21.5482
		160.982		10.5897
		36.9343		12.552
		7.32948		76.1831
		24.7297		96.9468
		37.5084		35.3318
		17.1238		73.9746
		18.6952		27.5841
		19.0868		106.695
		10.6762		8.22977
		27.0497		1.49698
		24.5506		30.8629
		10.9067		17.2804
		29.863		88.9843
		79.3748		24.5607
		23.7642		5.51957
		3.4966		9.98287
		13.36		66.1677
		20.3939		78.2916
		47.6254		44.4015
		86.1976		21.3084
		110.486		29.6343
		5.50883		6.46806
		64.4858		55.1225
		47.6682		33.5766
		14.9441		17.4711
		39.6316		40.6119
		16.7494		16.7161
		22.8987		40.7351
		36.0946		9.54913
		33.496		55.6655
		32.6754		15.3665
		35.6619		14.2199
		19.5249		16.6186
		112.213		16.9601
		102.306		31.9313
		79.5288		47.647
		60.5972		49.0458
		34.0151		22.6315
		28.8568		13.4971
		82.5675		63.5869
		18.0722		39.4623
		13.8653		117.771
		140.469		45.3567
		133.348		12.0825
		11.4325		12.5234
		11.9936		10.4693
		10.9914		28.0415
		36.5817		45.9292
		34.5785		85.781
		51.2603		21.8061
		3.62704		13.7911
		13.7505		47.1162
		35.1773		14.7485
		50.3932		25.6012
		16.8731		34.5039
		25.5195		7.25783
		39.8227		6.65855
		17.6455		40.2
		5.17268		20.8998
		12.732		9.97389
		9.02761		13.2235
		29.3219		55.6953
		21.1874		20.8198
		8.00769		13.4281
		17.7432		21.1659
		27.1046		54.4988
		11.6434		6.46732
		6.03083		16.6699
		30.7893		30.1671
		21.6534		28.5302
		19.1722		73.6064
		17.8713		24.3102
		13.5949		35.5963
		42.2136		15.7608
		14.9945		15.1479
		34.854		8.55212
		23.8313		40.4598
		5.85555		38.3643
		15.8131		9.55268
		3.36905		45.2164
		4.63055		19.9064
		6.16987		66.3395
		15.0839		6.05232
		23.6006		40.6361
		6.81607		105.168
		27.0395		44.4615
		106.886		17.2214
		9.20709		30.7032
		19.6404		103.185
		17.4876		43.1456
		23.5743		105.485
		24.8292		63.8126
		29.662		17.2005
		50.5623		50.8565
		11.4744		26.6404
		15.4441		25.6941
		13.8739		36.6903
		22.7559		30.6674
		27.9795		35.0422
		21.5831		30.7393
		40.6861
		119.188
		23.9199
		15.1806
		28.355
		74.1465
		78.0163
		6.3953
		28.0246
		101.285
		43.7364
		94.7633
		3.94273
		30.522
		20.403
		25.0733
		19.2693
		92.3421
		16.7398
		109.743
		19.7139
		40.7861
		17.1416
		23.9837
		18.6465
		19.0606
		31.3144
		11.8536
		58.7796
		14.4128
		22.8349
		49.0182
		7.09804
		8.54145
		15.9087
